1

2

3

4

5

6

7 **BRCA1/BRC-1 and SMC-5/6 regulate DNA repair pathway engagement during *C. elegans* meiosis**

8 Erik Toraason<sup>1</sup>, Alina Salagean<sup>1</sup>, David E. Almanzar<sup>2</sup>, Ofer Rog<sup>2</sup>, and Diana E. Libuda<sup>1\*</sup>

9

10 <sup>1</sup> Institute of Molecular Biology, Department of Biology, University of Oregon, 1229 Franklin Boulevard,

11 Eugene, OR 97403, USA

12 <sup>2</sup> School of Biological Sciences and Center for Cell and Genome Sciences, University of Utah, Salt Lake

13 City, UT 84112, USA

14 \* Corresponding Author (dlibuda@uoregon.edu)

15 **Abstract**

16 The preservation of genome integrity during sperm and egg development is vital for reproductive  
17 success. During meiosis, the tumor suppressor BRCA1/BRC-1 and structural maintenance of  
18 chromosomes 5/6 (SMC-5/6) complex genetically interact to promote high fidelity DNA double strand  
19 break (DSB) repair, but the specific DSB repair outcomes these proteins regulate remain unknown. Here  
20 we show that BRCA1/BRC-1 and the SMC-5/6 complex limit intersister crossover recombination as well  
21 as error-prone repair pathways during meiotic prophase I. Using genetic and cytological methods to  
22 monitor repair of DSBs with different repair partners in *Caenorhabditis elegans*, we demonstrate that  
23 both BRC-1 and SMC-5/6 repress intersister crossover recombination events, with meiotic cells  
24 becoming more dependent upon these proteins to repair DSBs in late meiotic prophase I. Sequencing of  
25 conversion tracts from homolog-independent DSB repair events indicates that BRC-1 regulates  
26 intersister/intrachromatid noncrossover conversion tract length. Moreover, we find that BRC-1 also  
27 specifically inhibits error prone repair of DSBs induced at mid-pachytene. Finally, we reveal that  
28 functional BRC-1 enhances DSB repair defects in *smc-5* mutants by repressing theta-mediated end  
29 joining (TMEJ). Taken together, our study illuminates the coordinate interplay of BRC-1 and SMC-5/6 to  
30 regulate DSB repair outcomes in the germline.

31

## 32 **Introduction**

33 Meiosis is the specialized form of cell division by which most sexually reproducing organisms  
34 generate haploid gametes. In a diploid organism, each meiotic cell begins prophase I with four copies of  
35 the genome – two homologous chromosomes (homologs) and an identical replicate of each homolog  
36 called a sister chromatid. As mutations incurred in the gamete genome will be passed on to the  
37 resultant progeny, it is crucial that genome integrity be maintained during meiosis. Despite this risk, a  
38 highly conserved feature of the meiotic program is induction of DNA double strand breaks (DSBs) by the  
39 topoisomerase-like protein Spo11 (Keeney *et al.* 1997). A limited subset of DSBs must engage the  
40 homologous chromosome as a recombination partner and be resolved as a crossover event, which  
41 forges a physical connection between homologs that facilitates accurate chromosome segregation at the  
42 meiosis I division. DSBs are incurred in excess of the number of eventual crossovers, therefore other  
43 pathways must be utilized to repair residual DSBs. How meiotic cells regulate repair pathway  
44 engagement to both accurately and efficiently resolve DSBs is a critical question in the field of genome  
45 integrity.

46 The majority of meiotic DSBs are repaired through interhomolog noncrossover recombination  
47 mechanisms (Hunter 2015). Multiple models are proposed for how meiotic noncrossover repair occurs.  
48 Evidence in *Drosophila* suggests that both interhomolog noncrossovers and crossovers may be  
49 generated by differential processing of similar joint molecule intermediates (Crown *et al.* 2014). Work in  
50 budding yeast, mammals, and *Arabidopsis* indicates that the majority of interhomolog noncrossovers  
51 are generated via synthesis-dependent strand annealing (SDSA) with the homolog (Hunter 2015). In  
52 SDSA, the resected end of the DSB invades a repair template, synthesizes new sequence, dissociates  
53 from its repair template, and finally utilizes the synthesized sequence to anneal to the other resected  
54 end of the DSB.

55 Meiotic DSBs may also be resolved by recombination with the sister chromatid (Schwacha and  
56 Kleckner 1997; Goldfarb and Lichten 2010; Toraason *et al.* 2021a; Almanzar *et al.* 2021). In budding  
57 yeast, DSB resolution by intersister recombination is disfavored so as to promote DSB repair with the  
58 homologous chromosome in wild type conditions (Schwacha and Kleckner 1994, 1997; Goldfarb and  
59 Lichten 2010; Kim *et al.* 2010; Humphries and Hochwagen 2014). In metazoan meiosis, however, the  
60 engagement of intersister repair has proven challenging to detect and quantify. While recombination  
61 between polymorphic homologs may be readily studied via sequence conversions in final repair  
62 products, the identical sequences of sister chromatids preclude the detection of intersister  
63 recombination by sequencing-based approaches. Recently, two methods have been developed in the  
64 nematode *Caenorhabditis elegans* to enable direct detection of homolog-independent meiotic  
65 recombination (Toraason *et al.* 2021a; Almanzar *et al.* 2021). Toraason *et al.* 2021a constructed an  
66 intersister/intrachromatid repair (ICR) assay, which exploits nonallelic recombination at a known locus in  
67 the genome to identify homolog-independent repair events in resultant progeny. Almanzar *et al.* 2021  
68 designed an EdU labeling assay to cytologically identify sister chromatid exchanges (SCEs) in compacted  
69 chromosomes at diakinesis. Together, these studies demonstrated that: 1) homolog-independent  
70 meiotic recombination occurs in *C. elegans*; 2) the sister chromatid and/or same DNA molecule is the  
71 exclusive recombination repair template in late prophase I; and, 3) intersister crossovers are rare and  
72 represent a minority of homolog-independent recombination products (Toraason *et al.* 2021a; Almanzar  
73 *et al.* 2021).

74 While meiotic cells primarily utilize recombination to resolve DSBs, error prone repair pathways  
75 are also available in meiosis to repair DSBs at the risk of introducing *de novo* mutations (Gartner and  
76 Engebrecht 2022). These error prone mechanisms are repressed to promote recombination repair, but  
77 are activated in mutants that disrupt recombination (Lemmens *et al.* 2013; Yin and Smolikove 2013;  
78 Macaisne *et al.* 2018; Kamp *et al.* 2020). Non-homologous end joining (NHEJ), which facilitates the

79 ligation of blunt DNA ends by the DNA ligase IV homolog *LIG-4*, is active in the *C. elegans* germline (Yin  
80 and Smolikove 2013; Macaisne *et al.* 2018). Recent studies have indicated that microhomology-  
81 mediated end-joining facilitated by the DNA polymerase  $\theta$  homolog *POLQ-1* (theta-mediated end-  
82 joining, TMEJ) is the primary pathway by which small mutations are incurred in *C. elegans* germ cells  
83 (Van Schendel *et al.* 2015; Kamp *et al.* 2020). Neither NHEJ nor TMEJ are required for successful meiosis  
84 (Colaiácovo *et al.* 2003; Lemmens *et al.* 2013; Volkova *et al.* 2020; Kamp *et al.* 2020), indicating  
85 recombination is sufficient for meiotic DSB repair and gamete viability under normal conditions.

86         The structural maintenance of chromosomes 5/6 complex and tumor suppressor *BRCA1* (*SMC-*  
87 *5/6* and *BRC-1* respectively in *C. elegans*) are highly conserved and regulate meiotic DSB repair in *C.*  
88 *elegans* (Bickel *et al.* 2010; Hong *et al.* 2016; Li *et al.* 2018; Kamp *et al.* 2020). The *SMC-5/6* complex is  
89 vital for preservation of meiotic genome integrity, as *C. elegans* mutants for *smc-5* exhibit a  
90 transgenerational sterility phenotype (Bickel *et al.* 2010). Although null mutations of *smc-5*, *smc-6*, and  
91 *brc-1* revealed that they are not required for development nor reproduction in *C. elegans* (Adamo *et al.*  
92 2008; Bickel *et al.* 2010; Li *et al.* 2018), both *SMC-5/6* and *BRC-1* are required for efficient DSB repair, as  
93 *smc-5* and *brc-1* null mutants both display meiotic chromosome fragmentation at diakinesis indicative of  
94 unresolved DSBs (Bickel *et al.* 2010). *BRC-1* has also been shown to repress error prone DSB repair via  
95 NHEJ and TMEJ (Li *et al.* 2020; Kamp *et al.* 2020). Further, *SMC-5/6* and *BRC-1* may promote genome  
96 integrity in part by facilitating efficient recombination, as *smc-5* and *brc-1* mutants exhibit persistent  
97 DSBs marked by the recombinase *RAD-51* (Boulton *et al.* 2004; Adamo *et al.* 2008; Bickel *et al.* 2010;  
98 Kamp *et al.* 2020), suggesting that early recombination steps are delayed in these mutants. *BRC-1*  
99 further prevents recombination between heterologous templates to promote accurate recombination  
100 repair (León-Ortiz *et al.* 2018). Despite these apparent DNA repair defects, interhomolog crossover  
101 formation is largely unaffected by *smc-5* and *brc-1* mutations (Adamo *et al.* 2008; Bickel *et al.* 2010; Li *et*

102 *al.* 2018). Taken together, these data support the hypothesis that SMC-5/6 and BRC-1 may be required  
103 for intersister repair in *C. elegans*.

104 SMC-5/6 and BRC-1 genetically interact to regulate DSB repair. The incidence of unresolved  
105 DSBs in *smc-5* and *brc-1* mutants are not additive in the double *smc-5;brc-1* mutant context, which  
106 suggests that SMC-5/6 and BRC-1 may share some DSB repair functions (Bickel *et al.* 2010). Other  
107 experiments, however, indicate opposing functions for SMC-5/6 and BRC-1, as both the mitotic DNA  
108 replication defects in *smc-5* mutants and the synthetic lethality of *smc-5;him-6* (BLM helicase) double  
109 mutants are suppressed by *brc-1* mutation (Wolters *et al.* 2014; Hong *et al.* 2016). Crucially, the specific  
110 steps of recombination regulated by SMC-5/6 and BRC-1 which intersect to influence DNA repair  
111 outcomes remain unknown.

112 To determine the DSB repair functions of SMC-5/6 and BRC-1 which regulate DNA repair  
113 outcomes during *C. elegans* meiosis, we employed a multipronged approach utilizing genetic assays,  
114 cytology, sequence analysis of recombinant loci, and functional DSB repair assays in *smc-5* and *brc-1*  
115 mutants. We find that SMC-5/6 and BRC-1 function to repress meiotic intersister crossover  
116 recombination, and that BRC-1 specifically regulates homolog-independent noncrossover intermediate  
117 processing. Through these experiments, we also find that BRC-1 prevents mutagenic DSB repair at the  
118 mid-pachytene stage of meiotic prophase I. By assessing germ cell capacity to resolve exogenous DSBs,  
119 we demonstrate that meiotic nuclei become more dependent on SMC-5/6 and BRC-1 for DSB repair in  
120 late stages of meiotic prophase I. Finally, we reveal that *smc-5* mutant DSB repair defects are enhanced  
121 by functional BRC-1, which impedes gamete viability in part by repressing error prone repair pathways.  
122 Taken together, our study defines specific functions and interactions of BRC-1 and SMC-5/6 to regulate  
123 meiotic DSB repair outcomes across meiotic prophase I.

124

125 **Results**

126 **BRC-1 restricts intersister crossovers**

127 To directly assess the functions of BRC-1 in homolog-independent DSB repair, we employed the  
128 recently developed intersister/intrachromatid (ICR) assay (Toraason *et al.* 2021a; b). The ICR assay  
129 enables: 1) the controlled generation of a single DSB in *C. elegans* meiotic nuclei via heat shock inducible  
130 mobilization of a Mos1 transposon (Bessereau *et al.* 2001; Robert and Bessereau 2007); 2) detection of  
131 the repair outcome of the induced DSB with the sister chromatid or same DNA molecule by  
132 reconstituting GFP fluorescence in resultant progeny; and, 3) delineation of homolog-independent  
133 crossover and noncrossover recombination outcomes (Toraason *et al.* 2021a). Since the *C. elegans*  
134 germline is organized in a spatial-temporal gradient in which nuclei move progressively through the  
135 stages of meiotic prophase I along the distal-proximal axis (Jaramillo-Lambert *et al.* 2007; Rosu *et al.*  
136 2011; Cahoon and Libuda 2021), oocytes at all stages of meiotic prophase I can be affected  
137 simultaneously by a specific treatment, such as heat shock or irradiation. Since the rate of meiotic  
138 progression in the *C. elegans* germline is known (Jaramillo-Lambert *et al.* 2007; Rosu *et al.* 2011; Cahoon  
139 and Libuda 2021), we can score resultant progeny at specific timepoints post heat shock to distinguish  
140 oocytes which incurred a Mos1-excision induced DSB at the stages of prophase I when the homologous  
141 chromosome is available as a repair partner (the ‘interhomolog window’, leptotene-mid pachytene, 22-  
142 58hr post heat shock) from the stages when the homolog is not readily engaged for DSB repair (the  
143 ‘non-interhomolog window’, late pachytene-diplotene, 10-22hr post heat shock) (Rosu *et al.* 2011).

144 We performed the ICR assay in a *brc-1(xoe4)* mutant, which removes the entire *brc-1* coding  
145 sequence (Li *et al.* 2018). If BRC-1 is required for efficient intersister repair, then we expected the overall  
146 frequency of ICR assay GFP+ progeny to be reduced. Contrary to this hypothesis, we found that GFP+  
147 progeny were elevated at all interhomolog window timepoints and were not reduced within the non-

148

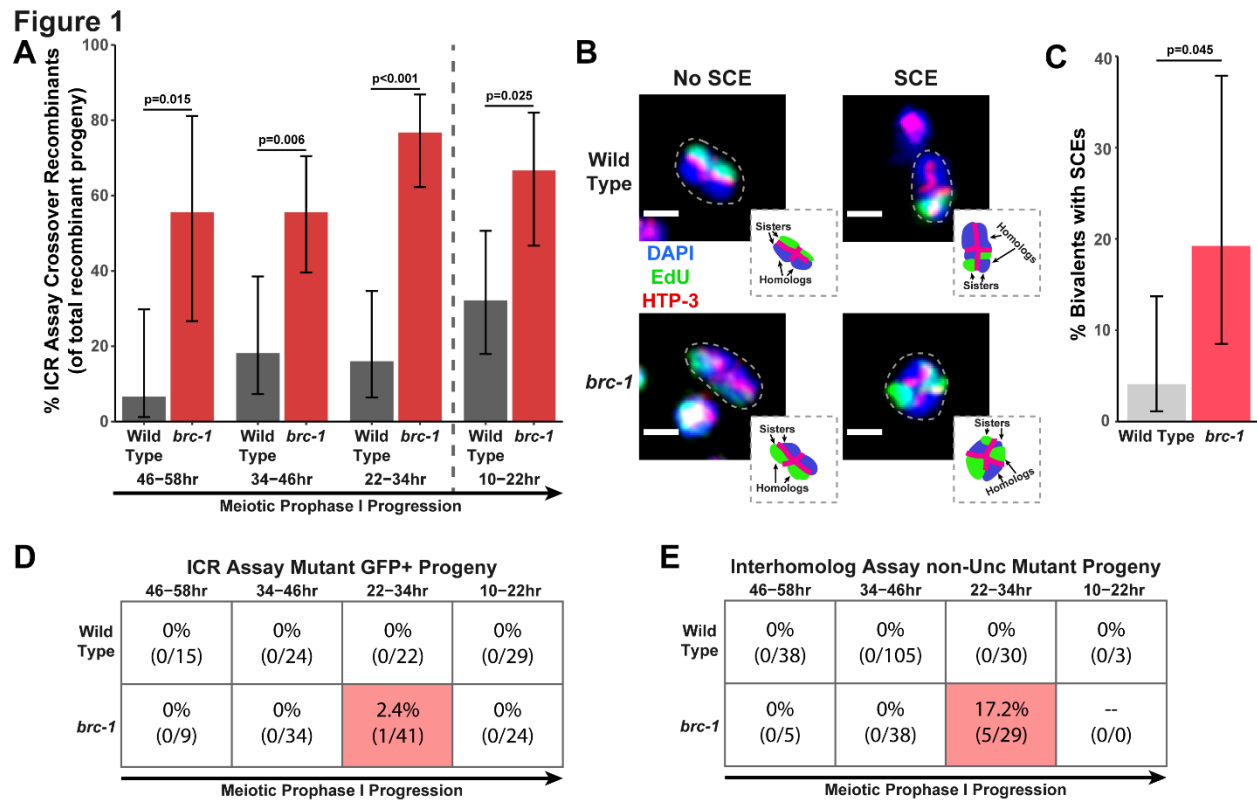

149

150 **Figure 1. BRC-1 represses intersister crossovers and error-prone repair.** A) Bar plot displaying the  
 151 percent of crossover recombinant progeny identified in wild type and *brc-1* ICR assays out of all  
 152 recombinant progeny scored. Frequencies of recombinants identified overall in ICR assays is displayed in  
 153 Supplemental Figure 1A. B) Images of wild type and *brc-1(xoe4)* mutant bivalent chromosomes  
 154 displaying an absence or presence of SCEs. Scale bars represent 1 $\mu$ m. Dashed bordered insets contain  
 155 cartoon depictions of the SCE and non-SCE bivalents which are outlined with dashed lines in the images  
 156 to aid in visualizing exchange events. C) Frequency of SCEs identified among wild type (n=49) or *brc-1*  
 157 mutant (n=26) bivalents scored. D-E) Tables displaying the percent of sequenced GFP+ progeny in wild  
 158 type and *brc-1* ICR assays (D) or non-Unc progeny IH assays (E) which showed signatures of mutagenic  
 159 repair. Numbers in parentheses indicate the number of mutant worms out of the total number of  
 160 sequenced progeny. Shaded boxes indicate timepoints in which mutant progeny were identified. The  
 161 overall frequency of interhomolog assay non-Unc progeny is displayed in Supplemental Figure 2A-B. In  
 162 all panels, error bars represent 95% Binomial confidence intervals, dashed vertical lines delineate  
 163 between timepoints within the interhomolog window (22-58hr post heat shock) and non-interhomolog  
 164 window (10-22hr post heat shock), and p values were calculated using Fisher's Exact Test.

165 **Figure 1 – source data 1. The source data for Figure 1A, 1D are provided.** [Figure 1 source data 1.xlsx].  
 166 The total number of ICR assay progeny with GFP+ or non-GFP+ phenotypes are listed. Wild type data I  
 167 shared with Figure 2 and Supplemental Figure 1.



168 **Figure 1 – source data 2. The source data for Figure 1C is provided.** [Figure 1 source data 2.xlsx]. The  
169 number of scorable chromatid pairs with SCE or no SCE events (no\_SCE) are listed for each image  
170 assessed in generating this dataset. Wild type data is shared with Figure 2.

171 **Figure 1 – source data 3. The source data for Figure 1E is provided.** [Figure 1 source data 3.xlsx]. The  
172 total number of IH assay progeny with recombinant or mutant nonUnc phenotypes or Unc  
173 nonrecombinant phenotypes are listed. Wild type data is shared with Figure 2 and Supplemental Figure  
174 2.

175

176 an overall increase in intersister/intrachromatid repair in *brc-1* mutants (see Methods). Regardless of  
177 the absolute number of ICR assay GFP+ progeny, we identified both crossover and noncrossover  
178 interhomolog window (Supplemental Figure 1A). This result could be explained by multiple effects, such  
179 as altered repair template bias, and therefore does not necessarily represent recombinant progeny at all  
180 timepoints scored (Supplemental Figure 1A), demonstrating that BRC-1 is not required for  
181 intersister/intrachromatid crossover or noncrossover repair. Notably, the overall proportion of  
182 crossover progeny among recombinants identified was increased at all timepoints scored (Figure 1A),  
183 suggesting that BRC-1 functions in *C. elegans* meiosis to repress intersister/intrachromatid crossover  
184 events.

185 To confirm that intersister crossovers are more frequent in a *brc-1* mutant, we employed a  
186 recently developed cytological assay which utilizes EdU incorporation to visualize sister chromatid  
187 exchanges (SCEs) in compacted diakinesis chromosomes (Figure 1B) (Almanzar *et al.* 2021, 2022).  
188 Notably, this cytological assay detects SCEs from endogenous SPO-11 induced DSBs. While SCEs are  
189 found in only 4.1% of bivalents in a wild type background (2/49 bivalents scored, 95% Binomial CI 1.1-  
190 13.7%) (Almanzar *et al.* 2021), we detected SCEs at an elevated rate of 19.2% in a *brc-1(xoe4)* mutant  
191 (Figure 1B-1C, 5/26 bivalents scored, 95% Binomial CI 8.5-37.9%, Fisher's Exact Test p=0.045). When we  
192 compared the levels of SCEs cytologically identified with the frequency of ICR assay crossovers  
193 generated from Mos1-induced DSBs within the interhomolog window, the elevated frequency of SCEs  
194 (4.7 fold increase) closely mirrored the relative increase in crossovers as a proportion of all

195 recombinants observed in the *brc-1* mutant ICR assay (4.6 fold increase). Taken together, these results  
196 demonstrate that BRC-1 functions to suppress intersister crossover recombination during *C. elegans*  
197 meiosis for both SPO-11-induced DSBs as well as Mos1-induced DSBs.

### 198 **BRC-1 is not required for interhomolog recombination**

199 Since BRC-1 acts to suppress crossover recombination between sister chromatids, we next assessed if  
200 *brc-1* mutants exhibit defects in interhomolog recombination, including interhomolog crossovers. To  
201 assess the overall rates of interhomolog noncrossover and crossover recombination, we employed an  
202 established interhomolog (IH) recombination assay (Rosu *et al.* 2011) which enables: 1) controlled  
203 generation of a single DSB in meiotic nuclei via heat-shock inducible Mos1 excision (Robert and  
204 Bessereau 2007); 2) identification of interhomolog DSB repair of the induced DSB by reversion of an  
205 uncoordinated movement 'Unc' phenotype (non-Unc progeny, see Methods); and, 3) delineation of  
206 interhomolog noncrossover and crossover repair outcomes (see Methods). Notably, DSB repair in the IH  
207 assay which produces in-frame insertions or deletions can also yield non-Unc progeny which are  
208 phenotypically indistinguishable from noncrossover recombinants (Robert *et al.* 2008). While mutagenic  
209 repair in the IH assay is rare in a wild type context (Robert *et al.* 2008), *brc-1* mutants are known to incur  
210 small mutations more frequently (Kamp *et al.* 2020; Meier *et al.* 2021). We therefore sequenced the  
211 repaired *unc-5* locus of putative noncrossover non-Unc progeny in the IH assay to confirm whether the  
212 repaired sequence matched the homolog repair template or indicated mutations at the site of Mos1  
213 excision (see Methods). Non-Unc progeny which we were unable to sequence were designated as  
214 'undetermined non-Unc'.

215           When we performed the IH assay in the *brc-1* mutant, we observed a significant increase in the  
216 proportion of non-Unc progeny only at the 22-34hr timepoint, which corresponds to the mid pachytene

## Supplemental Figure 1 Intersister/Intrachromatid Repair (ICR) Assay

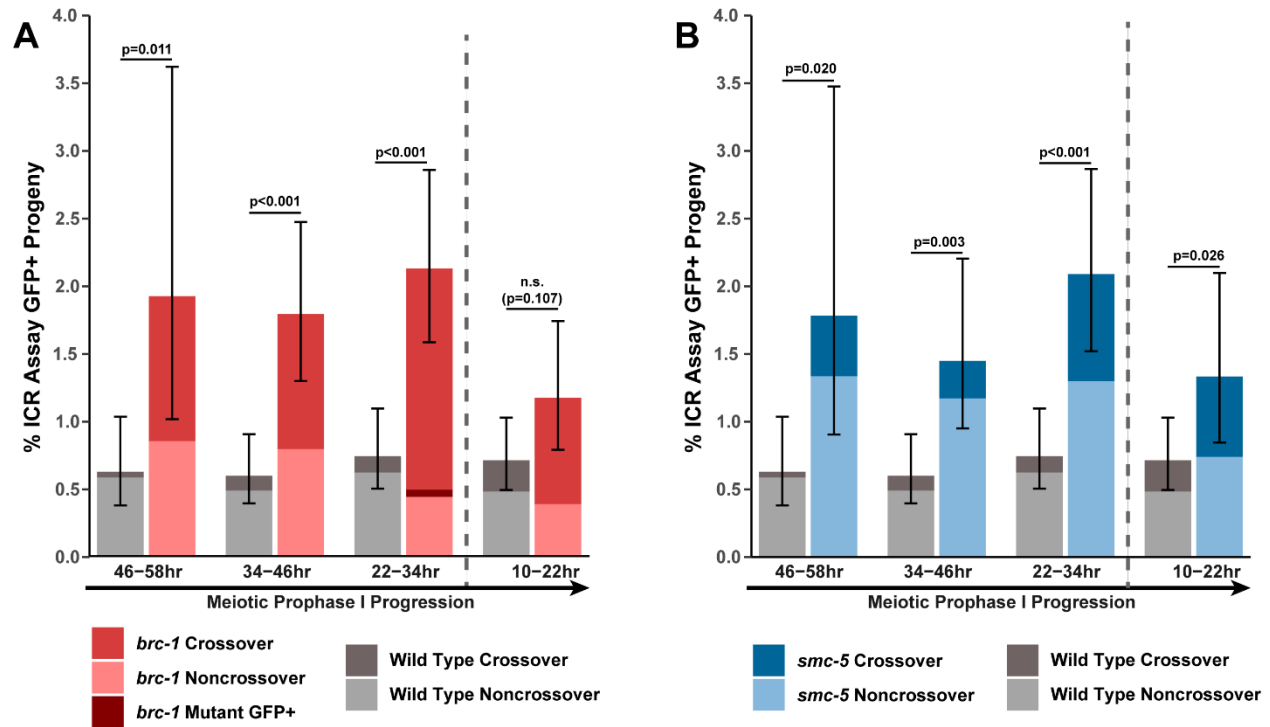

218 **Supplemental Figure 1. Intersister/intrachromatid repair (ICR) assay GFP+ progeny are elevated in *brc-***  
 219 ***1* and *smc-5* mutants.** Stacked bar plots displaying the percent of all progeny scored in wild type and  
 220 *brc-1* (A) or *smc-5* (B) ICR assays which were determined to be GFP+ noncrossover recombinants,  
 221 crossover recombinants, or mutants. Error bars represent the 95% Binomial confidence intervals for the  
 222 frequencies of GFP+ progeny. P values were calculated by Fisher's Exact test. Vertical dashed lines  
 223 demarcate the interhomolog window (22-58hr post heat shock) and non-interhomolog window (10-22hr  
 224 post heat shock) timepoints.

225 **Supplemental Figure 1 – source data 1. The source data for Supplemental Figure 1 is provided.**  
 226 [Supplemental Figure 1 source data.xlsx]. The total number of ICR assay progeny with GFP+ or non-GFP+  
 227 phenotypes are listed. Wild type data is shared with Figure 1 and Figure 2.

## Supplemental Figure 2

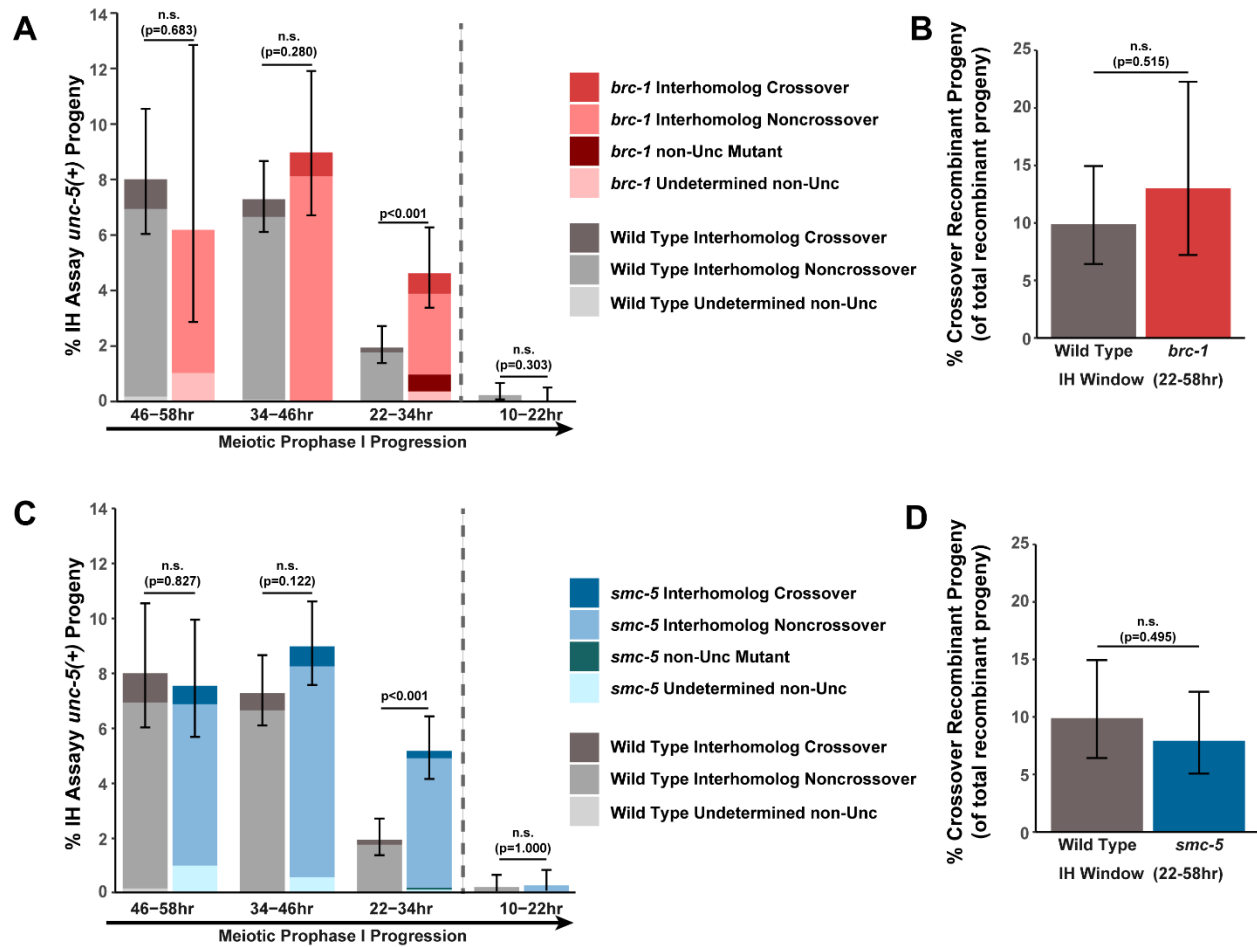

229 **Supplemental Figure 2. Interhomolog repair is largely unperturbed in *brc-1* and *smc-5* mutants.** A)   
 230 Stacked bar plots displaying the percent of all progeny scored in wild type and *brc-1* IH assays which   
 231 were determined to be noncrossover recombinants, crossover recombinants, non-Unc mutants, or   
 232 undetermined non-Unc. B) Percent of all recombinant progeny identified within the interhomolog   
 233 window of wild type and *brc-1* IH assays which were crossover recombinants. C) Stacked bar plots   
 234 displaying the percent of all progeny scored in wild type and *smc-5* IH assays which were determined to   
 235 be noncrossover recombinants, crossover recombinants, non-Unc mutants, or undetermined non-Unc.   
 236 D) Percent of all recombinant progeny identified within the interhomolog window of wild type and *smc-5*   
 237 IH assays which were crossover recombinants. Error bars represent the 95% Binomial confidence   
 238 intervals for the frequencies of non-Unc progeny. P values were calculated by Fisher's Exact test. Vertical   
 239 dashed lines demarcate the interhomolog window (22-58hr post heat shock) and non-interhomolog   
 240 window (10-22hr post heat shock) timepoints.

241 **Supplemental Figure 2 – source data 1. The source data for Supplemental Figure 2 is provided.**

242 [Supplemental Figure 2 source data 1.xlsx]. The total number of IH assay progeny with recombinant or   
 243 mutant nonUnc phenotypes or Unc nonrecombinant phenotypes are listed. Wild type data is shared   
 244 with Figure 1 and Figure 2.

245 stage of meiosis and the end of the interhomolog window (Supplemental Figure 2A, Fisher's Exact Test  
246  $p < 0.001$ ). This result may indicate a slight delay in the rate of meiotic progression in *brc-1* mutants  
247 (Rosu *et al.* 2011). However, the overall frequency of non-Unc progeny was not elevated relative to wild  
248 type within the non-interhomolog window (Supplemental Figure 2A, 10-22hr post heat shock, Fisher's  
249 Exact Test  $p = 0.303$ ), indicating that ablation of *brc-1* does not severely impact meiotic prophase I  
250 progression.

251         When we compared the ratio of crossover and noncrossover recombinant progeny within the  
252 interhomolog window between wild type and *brc-1* mutants, we saw that the frequency of  
253 interhomolog crossovers was not significantly altered (Supplemental Figure 2B, Fisher's Exact Test  
254  $p = 0.515$ ). This result mirrors recombination assays previously performed in *brc-1* mutants which  
255 provided no evidence for the presence of additional crossovers (Li *et al.* 2018). Thus, our data supports a  
256 role for BRC-1 in regulating crossover recombination specifically between sister chromatids.

### 257 **BRC-1 prevents mutagenic DNA repair during the mid-pachytene stage**

258         In both the ICR and IH assays performed in *brc-1* mutants, we identified progeny which  
259 exhibited molecular signatures of mutagenic DSB repair at the Mos1 excision site (Figure 1D-E,  
260 Supplemental Figure 1A, Supplemental Figure 2A). These events were only identified within the 22-34hr  
261 timepoint, which is composed of nuclei in mid pachytene at the time of Mos1 excision. In the ICR assay,  
262 mutants were identified as 2.4% (95% Binomial CI 0.4-12.5%) of all sequenced GFP+ progeny at the 22-  
263 34hr time point. In the IH assay, 13.2% (95% Binomial CI 7.6-34.5%) of all sequenced non-Unc progeny  
264 at the 22-34hr time point were identified as mutant (Figure 1D-E). Notably, we only sequenced GFP+  
265 and non-Unc progeny in the ICR and IH assays respectively. The frequency of error prone pathway  
266 utilization in a *brc-1* mutant is therefore likely much greater than our results suggest, as we could not  
267 detect mutations which disrupt the GFP or *unc-5* open reading frames.

### Supplemental Figure 3

**A**

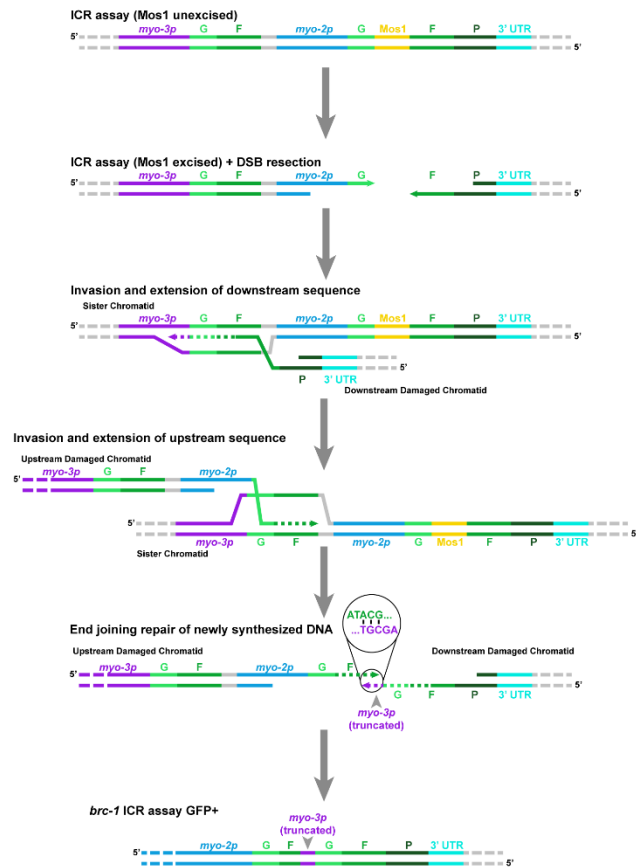

**B**

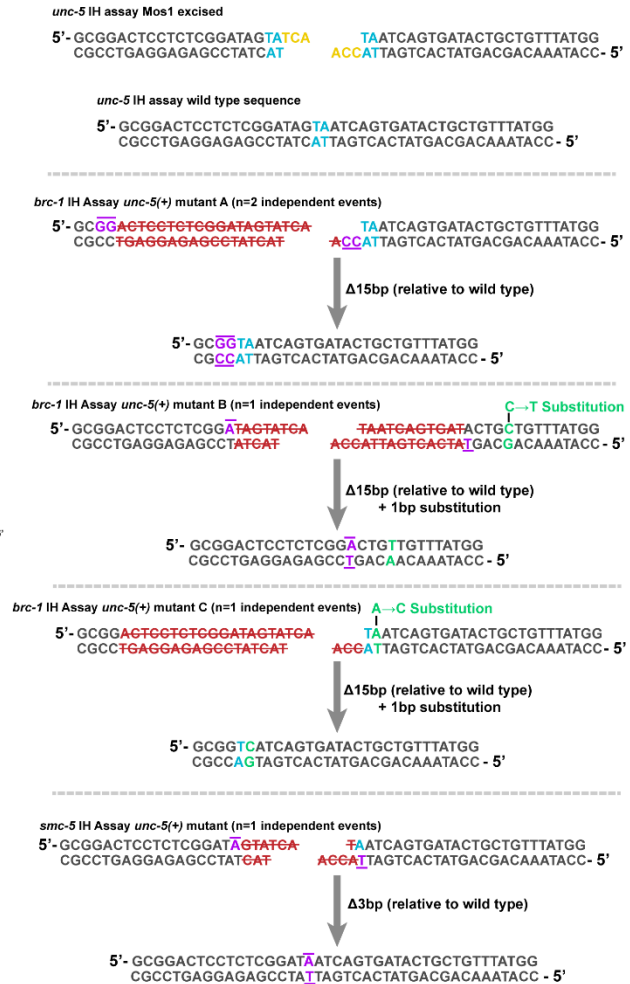

268

269 **Supplemental Figure 3. Illustrations of mutants identified in ICR and IH assays.** A) Illustrated depiction  
 270 of ICR assay GFP+ mutant identified in a *brc-1* mutant background (Figure 1D, Supplemental Figure 1A).  
 271 The partial tandem duplication produced (bottom) can best be parsimoniously explained by two  
 272 independent strand invasion and extension events on either end of the DSB. For simplicity, intersister  
 273 recombination is depicted in this diagram. However, intrachromatid templates could also have been  
 274 engaged to produce the final product. B) Illustrations of *unc-5* lesions identified in IH assay non-Unc  
 275 progeny in *brc-1* or *smc-5* mutants. Specific mutation signatures are separated by horizontal dashed grey  
 276 lines. The wild type *unc-5* locus sequence at the site of Mos1 excision and the DSB product generated by  
 277 Mos1 excision in the *unc-5(ox171)* locus, while yellow letters indicate the 3nt 3' overhangs left  
 278 following Mos1 insertion in the *unc-5(ox171)* locus, while yellow letters indicate the 3nt 3' overhangs left  
 279 following Mos1 insertion (Robert *et al.* 2008). In the panels displaying mutations identified, purple letters  
 280 with bars indicate complementary bases flanking the deletion site. Red letters struck through with red  
 281 lines indicate bases in the damaged locus which were deleted to produce the final product. Green  
 282 letters indicate sites of nucleotide substitution mutations.

283           Of the meiotic lesions we identified among *brc-1* IH assay progeny (see Methods), 75% (3/4  
284 mutations) exhibited one or more complementary nucleotides on both ends of the deletion  
285 (Supplemental Figure 3B). Further, the single mutant identified among *brc-1* ICR assay GFP+ progeny  
286 displayed a particularly striking duplication joined at a position sharing microhomology (Supplemental  
287 Figure 3A). Regions of microhomology present on either end of small (<50bp) deletions and templated  
288 insertions are characteristic of theta mediated end joining (TMEJ) (Van Schendel *et al.* 2015). A previous  
289 study demonstrated that the rate of TMEJ-mediated germline mutagenesis is elevated in *brc-1* mutants  
290 (Kamp *et al.* 2020). Our data is therefore concordant with elevated TMEJ engagement in *brc-1* mutants  
291 and further reveals that the function of BRC-1 in preventing mutagenic repair events is specifically vital  
292 in the mid-pachytene stage of meiotic prophase I.

### 293 **SMC-5/6 restricts intersister crossovers**

294           The SMC-5/6 DNA damage complex has been hypothesized to function in homolog-independent  
295 DSB repair in *C. elegans* (Bickel *et al.* 2010). To directly assess the functions of the structural  
296 maintenance of chromosomes 5/6 (SMC-5/6) complex in homolog-independent DSB repair, we  
297 performed the ICR assay in the *smc-5(ok2421)* null mutant. The *smc-5(ok2421)* deletion allele disrupts  
298 the final 6 exons of the 11 exons in the *smc-5* coding sequence and prevents SMC-5/6 complex  
299 assembly, as evidenced by both biochemical and cytological experiments (Bickel *et al.* 2010). SMC-5/6 is  
300 therefore not required for viability in *C. elegans*, unlike many other organisms (Aragón 2018). Similar to  
301 the *brc-1* mutant, we found that the frequency of GFP+ progeny in the ICR assay was elevated at all  
302 timepoints scored in *smc-5(ok2421)* null mutants (Supplemental Figure 1B). As mentioned above and in  
303 the Methods, this result does not necessarily represent an absolute increase in the rate of  
304 intersister/intrachromatid recombination (see Methods). Importantly, we did identify both crossover  
305 and noncrossover recombinants at all timepoints scored, demonstrating that SMC-5/6 is not required  
306 for noncrossover nor crossover homolog-independent repair (Supplemental Figure 1B).

307 To determine if SMC-5/6 regulates engagement of intersister/intrachromatid recombination  
308 outcomes, we examined the proportion of *smc-5* ICR assay crossover recombinants as a proportion of all  
309 recombinants identified. While the proportion of crossovers was not significantly different than wild-  
310 type within the individual 12-hour timepoints we scored (Figure 2A), the frequency of crossover  
311 recombinants in *smc-5* mutants was significantly elevated within the interhomolog window overall  
312 (Figure 2B, Fisher's Exact Test  $p=0.037$ ). Thus, our data suggests that a function of SMC-5/6 is to prevent  
313 homolog-independent crossovers arising from DSBs induced in early stages of meiotic prophase I. To  
314 cytologically affirm the results of our ICR assay, we assessed the frequency of SCEs in *smc-5(ok2421)*  
315 mutants by examining EdU labeled chromatids at diakinesis. Mutants for *smc-5* are known to have  
316 defects in chromosome compaction and produce misshapen bivalents (Bickel *et al.* 2010; Hong *et al.*  
317 2016). These defects made the majority of bivalents uninterpretable in the EdU labeling assay.  
318 Nonetheless, even among a limited sample, we identified SCEs in 50% of scored bivalents (Figure 2C-D,  
319 3/6 bivalents scored, 95% Binomial CI 18.8-81.2%, Fisher's Exact Test  $p=0.007$ ) as compared to only 4.1%  
320 of wild type bivalents (2/49 bivalents scored, 95% Binomial CI 1.1-13.7%) (Almanzar *et al.* 2021). This  
321 EdU labeling data in the *smc-5(ok2421)* null mutant represents a 12.2 fold increase in the rate of SCEs,  
322 which is notably more extreme than the 2.1 fold increase in the proportion of crossover recombinants  
323 observed in the IH window in our *smc-5* ICR assay data. Nevertheless, both our ICR assay and EdU  
324 labeling experiments support a function for SMC-5/6 in repressing intersister crossing over during *C.*  
325 *elegans* meiosis.

### 326 **SMC-5/6 is not required for interhomolog recombination**

327 To determine if the SMC-5/6 complex regulates interhomolog recombination, we performed the  
328 IH assay in the *smc-5(ok2421)* null mutant. We identified both interhomolog crossover and  
329 noncrossover recombinants in the IH assay (Supplemental Figure 2C), indicating that SMC-5/6 is not  
330 required for either of these recombination pathways. Similar to *brc-1* mutants, we noted elevated non-



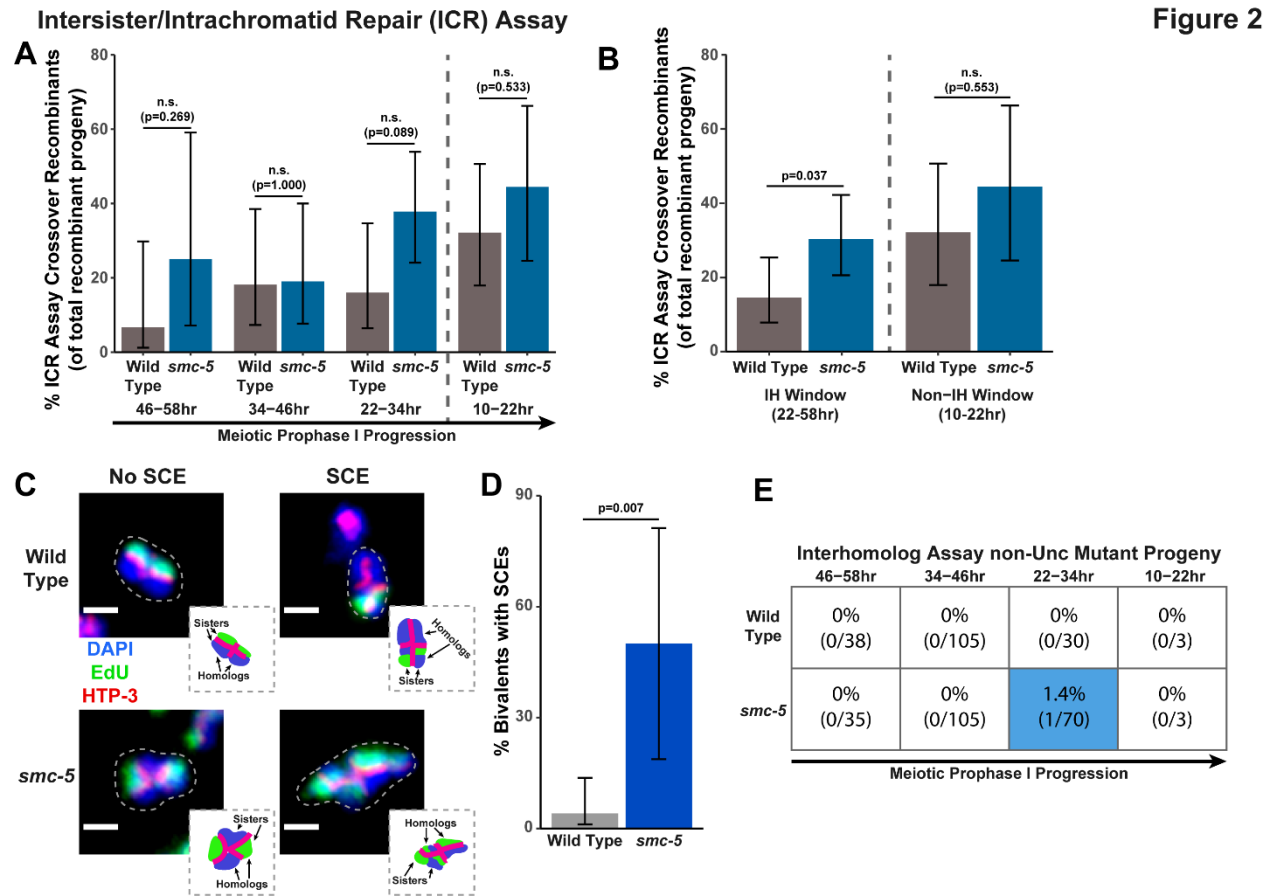

331

332 **Figure 2. SMC-5/6 represses intersister crossovers.** A) Bar plot displaying the percent of crossover  
 333 recombinant progeny identified in wild type and *smc-5* ICR assays out of all recombinant progeny scored  
 334 within individual 12 hour timepoint periods. Frequencies of recombinants identified overall in ICR assays  
 335 is displayed in Supplemental Figure 1B. B) Bar plot displaying the percent of crossover recombinant  
 336 progeny identified in wild type and *smc-5* ICR assays out of all recombinant progeny scored within the  
 337 interhomolog window (22-58hr post heat shock) and non-interhomolog window (10-22hr post heat  
 338 shock). C) Images of wild type and *smc-5(ok2421)* mutant bivalent chromosomes displaying an absence  
 339 or presence of SCEs. Scale bars represent 1 $\mu$ m. Dashed bordered insets contain cartoon depictions of  
 340 the SCE and non-SCE bivalents which are outlined with dashed lines in the images to aid in visualizing  
 341 exchange events. D) Frequency of SCEs identified among wild type (n=49) or *smc-5(ok2421)* mutant  
 342 (n=6) bivalents scored. E) Table displaying the percent of sequenced non-Unc progeny in wild type and  
 343 *smc-5* IH assays which showed signatures of mutagenic repair. Numbers in parentheses indicate the  
 344 number of mutant worms out of the total number of sequenced progeny. Colored boxes indicate  
 345 timepoints in which mutant progeny were identified. The overall frequency of interhomolog assay non-  
 346 Unc progeny is displayed in Supplemental Figure 2C-D. In all panels, error bars represent 95% Binomial  
 347 confidence intervals, dashed vertical lines delineate between timepoints within the interhomolog  
 348 window (22-58hr post heat shock) and non-interhomolog window (10-22hr post heat shock), and p  
 349 values were calculated using Fisher's Exact Test.

350 **Figure 2 – source data 1. The source data for Figure 2A is provided.** [Figure 2 source data 1.xlsx]. The  
 351 total number of ICR assay progeny with GFP+ or non-GFP+ phenotypes are listed. Wild type data is  
 352 shared with Figure 1 and Supplemental Figure 1.

353 **Figure 2 – source data 2. The source data for Figure 2D is provided.** [Figure 2 source data 2.xlsx]. The  
354 number of scorable chromatid pairs with SCE or no SCE events are listed for each image assessed in  
355 generating this dataset. Wild type data is shared with Figure 1.

356 **Figure 2 – source data 3. The source data for Figure 2E is provided.** [Figure 2 source data 3.xlsx]. The  
357 total number of IH assay progeny with nonUnc phenotypes or Unc nonrecombinant phenotypes are  
358 listed. Wild type data is shared with Figure 1 and Supplemental Figure 2.

359

360 Unc progeny at the 22-34hr time point in *smc-5* mutants, implying that meiotic prophase progression

361 may be slightly delayed when SMC-5/6 function is lost (Supplemental Figure 2C, Fisher's Exact Test

362  $p < 0.001$ ). Notably, non-Unc progeny were not increased in the non-interhomolog window in *smc-5*

363 mutants, suggesting that the progression of meiotic prophase I was not drastically altered in this genetic

364 context (Supplemental Figure 2C, Fisher's Exact Test  $p = 1.000$ ). The proportion of crossover

365 recombinants among all recombinants identified also was not altered in an *smc-5* mutant (Supplemental

366 Figure 2D, Fisher's Exact Test  $p = 0.495$ ). Thus, our data does not support a function for SMC-5/6 in

367 ensuring efficient interhomolog recombination.

368 Among all sequenced ICR and IH assay GFP+ and non-Unc progeny isolated in *smc-5* mutants, we

369 identified only one mutagenic DSB repair event at the 22-34hr timepoint of the IH assay (Figure 2E,

370 Supplemental Figure 2C, Supplemental Figure 3B). Moreover, the frequency of *smc-5* non-Unc mutants

371 which we detected at this timepoint (1.32% of all sequenced non-Unc progeny, 95% Binomial CI 0.2-

372 7.1%) is lower than the frequency observed in *brc-1* mutants (Fisher's Exact Test  $p = 0.015$ ). Previously,

373 profiling of meiotic mutagenic DNA repair events in *smc-6* mutants revealed that large structural

374 variations are a primary class of mutations which arise in SMC-5/6 deficient germlines (Volkova *et al.*

375 2020). In our *smc-5* ICR and IH assays, a greater frequency of DSBs may have been resolved by

376 mutagenic repair, but if these products disrupted the coding sequence in GFP or *unc-5* respectively, then

377 they would have escaped detection in our assays.

378

379 **BRC-1 promotes the formation of long homolog-independent noncrossover conversion tracts**

380 Since we identified functions for BRC-1 and SMC-5/6 in regulating intersister crossover recombination,  
381 we wanted to determine if recombination intermediate processing is altered in *brc-1* and *smc-5*  
382 mutants. Evaluation of sequence conversions have informed much of our understanding of  
383 recombination intermediate processing (Szostak *et al.* 1983; Pâques and Haber 1999; Marsolier-Kergoat  
384 *et al.* 2018; Ahuja *et al.* 2021). The ICR assay was engineered to contain multiple polymorphisms  
385 spanning 12bp to 567bp 3' from the site of Mos1 excision, enabling conversion tract analysis of  
386 homolog-independent recombination (Toraason *et al.* 2021a). In a wild type context, 74.2% of ICR assay  
387 noncrossover conversion tracts within the interhomolog window are 'short', which we define as tracts  
388 with a sequence conversion only at the most proximal polymorphism 12bp downstream from the site of  
389 Mos1 excision (Figure 4A, 4C, wild type 74.2% short tracts 95% CI 62.6-83.3%). In contrast to 74.2% of  
390 wild type noncrossover tracts during the interhomolog window being classified as 'short', 96.6% of *brc-1*  
391 noncrossover tracts during the interhomolog window were 'short' (*brc-1* interhomolog window 96.6%  
392 short tracts 95% CI 82.8-99.4%, Fisher's Exact Test p=0.010). During the non-interhomolog window, a  
393 null mutation of *brc-1* had no effect on the proportion of 'short' noncrossover tracts (Figure 3A, 3C, wild  
394 type 72.7% short tracts 95% CI 51.8-86.8%; *brc-1* 87.5% short tracts 95% CI 52.9-97.8%, Fisher's Exact  
395 Test p=0.638), thereby indicating that BRC-1 likely affects the mechanisms of noncrossover formation  
396 only during the interhomolog window.

397 We previously showed that wild type intersister/intrachromatid crossover conversion tracts in *C.*  
398 *elegans* tend to be larger than noncrossovers, with a median minimum conversion tract length (the  
399 distance from the most proximal to the most distal converted polymorphisms in bp) for  
400 intersister/intrachromatid crossovers being 198bp (Figure 3B) (Toraason *et al.* 2021a). Based on this  
401 median length for intersister/intrachromatid crossovers, we defined 'short' ICR assay crossover tracts as

**Figure 3**

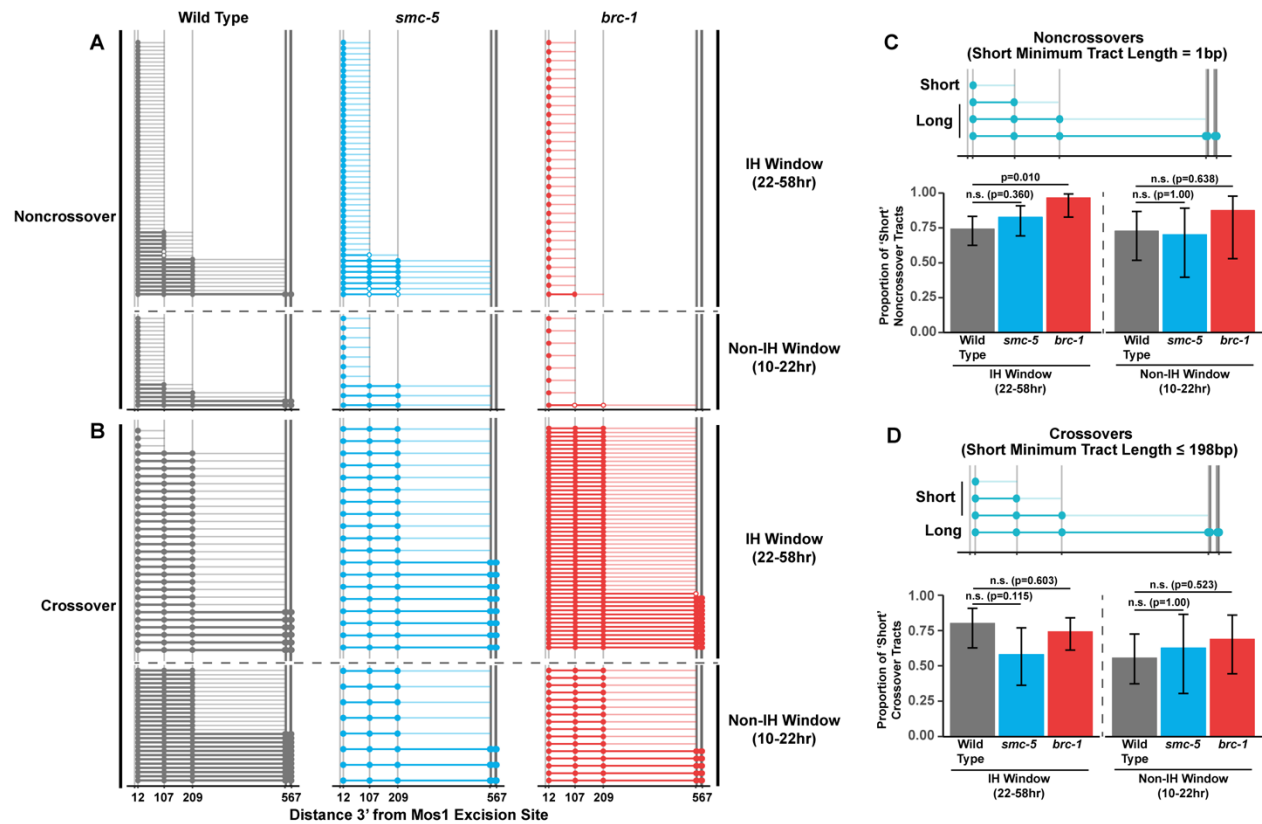

402

403 **Figure 3. BRC-1 is required for long noncrossover gene conversion.** A-B) Plots of conversion tracts  
 404 sequenced from recombinant ICR assay loci. Vertical grey lines indicate the positions of polymorphisms  
 405 in the ICR assay with bp measurements given 3' relative to the site of Mos1 excision (Toraason *et al.*  
 406 2021a; b). Each horizontal line represents a single recombinant sequenced, ordered from smallest tract  
 407 to largest tract within the interhomolog and non-interhomolog windows. Filled in points represent fully  
 408 converted polymorphisms, while points with white interiors represent heteroduplex DNA sequences  
 409 identified in conversion tracts. High opacity horizontal lines within plots represent the minimum  
 410 conversion tract length, or the distance from the most proximal to the most distal converted  
 411 polymorphisms. Low opacity horizontal lines indicate the maximum conversion tract, extending from the  
 412 most distal converted polymorphism to its most proximal unconverted polymorphism. Tracts from  
 413 noncrossover recombinants are displayed in A, while tracts from crossover recombinants are displayed  
 414 in B. C-D) Frequency of short noncrossover tracts (C, minimum tract length 1bp converted at only the  
 415 12bp polymorphism) or short crossover tracts (D, minimum tract length 198bp) as a proportion of all  
 416 tracts identified from progeny laid within the interhomolog and non-interhomolog windows. Error bars  
 417 represent the 95% binomial confidence intervals of these proportions and p values were calculated  
 418 using Fisher's Exact Test. Diagrams above bar plots depict the sizes of tracts considered 'long' or 'short'  
 419 in each respective group. In all panels, dashed grey lines delineate between the interhomolog window  
 420 (22-58hr post heat shock) and non-interhomolog window (10-22hr post heat shock) timepoints.

421 **Figure 3 – source data 1. The source data for Figure 3 is provided.** [Figure 3 source data 1.xlsx]. The  
 422 polymorphism conversions scored in individual sequenced ICR assay conversion tracts are listed.

423  $\leq 198$ bp in length. We found that the proportion of ‘short’ crossover tracts was not altered by *brc-1*  
424 mutation within the interhomolog window (Figure 3B, 3D, wild type 80.0% short tracts 95% CI 62.7-  
425 90.5%; *brc-1* 74.1% short tracts 95% CI 61.1-83.9%, Fisher’s Exact Test  $p=1.00$ ) nor within the non-  
426 interhomolog window (Figure 3B, 3D, wild type 55.6% short tracts 95% CI 37.3-72.4%; *brc-1* 68.8% short  
427 tracts 95% CI 44.4-58.8%, Fisher’s Exact Test  $p=0.657$ ). Taken together, these results support a model in  
428 which BRC-1 regulates mechanisms of intersister/intrachromatid noncrossover recombination (and not  
429 crossover recombination) in the early stages of meiotic prophase I.

#### 430 **SMC-5/6 does not regulate the extent of homolog-independent gene conversion**

431 To assess if SMC-5/6 influences recombination intermediates, we compared *smc-5* mutant ICR  
432 assay conversion tracts to their wild type counterparts. We found that ICR assay noncrossover  
433 conversion tracts in *smc-5* mutants exhibited a similar proportion of ‘short’ tracts to wild type in both  
434 the interhomolog (Figure 3A, 3C, wild type 74.2% short tracts 95% CI 62.6-83.3%; *smc-5* 82.6% short  
435 tracts 95% CI 69.3-90.9%, Fisher’s Exact Test  $p=0.360$ ) and non-interhomolog windows (Figure 3A, 3C,  
436 wild type 72.7% short tracts 95% CI 51.8-86.8%; *smc-5* 70% short tracts 95% CI 39.7-89.2%). Thus, SMC-  
437 5/6 does not have a strong effect on the extent of noncrossover gene conversion in  
438 intersister/intrachromatid repair.

439 When we compared the proportion of ‘short’ *smc-5* ICR assay crossover tracts to wild type, we  
440 similarly observed that there is no significant difference in the proportion of short and long crossover  
441 tracts in either the interhomolog (Figure 3B, 3D, wild type 80.0% short tracts 95% CI 62.7-90.5%; *smc-5*  
442 57.9% short tracts 95% CI 36.3—76.9%, Fisher’s Exact Test  $p=1.00$ ) or non-interhomolog windows  
443 (Figure 3B, 3D, wild type 55.6% short tracts 95% CI 37.3-72.4%; *smc-5* 62.5% short tracts 95% CI 30.6-  
444 86.3%, Fisher’s Exact Test  $p=1.00$ ). Taken together, these results do not support a function for SMC-5/6

445 in regulating the extent of noncrossover and crossover gene conversion which yields functional GFP  
446 repair products.

447 In our wild type, *brc-1*, and *smc-5* ICR assay conversion tracts, we additionally noted multiple  
448 instances of heteroduplex DNA in our sequencing (Figure 3A, 3B). DNA heteroduplex is a normal  
449 intermediate when recombination occurs between polymorphic templates but is usually resolved by the  
450 mismatch repair machinery. Our observation of these events across genotypes suggests that at a low  
451 frequency, mismatch repair may fail to resolve heteroduplex DNA during the course *C. elegans* meiotic  
452 DSB repair.

#### 453 **BRC-1 and SMC-5/6 genetically interact in resolving exogenous DSBs**

454 To determine whether the regulation of homolog-independent DSB repair involves interactions  
455 between SMC-5/6 and BRC-1, we assessed how *smc-5(ok2421);brc-1(xoe4)* double mutants respond to  
456 DSBs. Since genetically balanced *smc-5;brc-1* double mutants can still acquire mutations and become  
457 progressively sterile over the course of a few generations and the ICR assay requires multiple cross steps  
458 (see Methods), we assessed the resilience of *smc-5*, *brc-1*, and *smc-5;brc-1* mutant gametes to  
459 exogenous DSBs induced by ionizing radiation to minimize the impact of this reproductive dysfunction  
460 phenotype. Accordingly, we treated wild type, *smc-5*, *brc-1*, and *smc-5;brc-1* mutant adult  
461 hermaphrodites with 0, 2500, or 5000 Rads of ionizing radiation, which induces DSBs, and assayed the  
462 resultant progeny derived from their irradiated oocytes for larval viability (Supplemental Figure 4A).  
463 Importantly, we scored brood viability over a similar reverse time course as was done in our ICR and IH  
464 assays following irradiation (see Methods), enabling us to identify meiosis-stage specific DNA repair  
465 defects in these mutants. We noted variation in the brood viabilities of individual genotypes and  
466 individual hermaphrodites within genotypes (Supplemental Figure 4A), which indicates differences in  
467 baseline fertility even in unirradiated conditions. These baseline disparities posed a challenge in

468 interpreting the effects of ionizing radiation on brood viability, as the resilience of an irradiated cohort  
469 will be affected by both underlying fertility defects as well as the effects of the exogenous DNA damage  
470 that we sought to quantify. To estimate the effect of ionizing radiation on brood viability and to account  
471 for inter-hermaphrodite variance in our analysis, we employed a hierarchical statistical modeling  
472 approach using our dataset (Figure 4B, see Methods). From this analysis, we calculated a metric termed  
473 ‘gamma’ for each genotype, representing the sensitivity of a given genotype to ionizing radiation (Figure  
474 4B, see Methods). A gamma estimate of 1 indicates that irradiation has no effect on brood viability,  
475 while a gamma estimate of 0 indicates that all progeny of a genotype are inviable following irradiation.

476 To assess the differential sensitivities of *smc-5*, *brc-1*, and *smc-5;brc-1* mutants across meiotic prophase  
477 I, we compared the 95% credible intervals of the gamma estimates for each genotype within the  
478 interhomolog and the non-interhomolog windows for both moderate (2500 Rads) and high (5000 Rads)  
479 irradiation doses (Figure 4A). Across all irradiation doses and timepoints, we note that loss of *smc-5*  
480 conveys a greater sensitivity to exogenous DNA damage than loss of *brc-1* (Figure 4A), emphasizing that  
481 the SMC-5/6 complex prevents catastrophic defects following exogenous DNA damage induction.  
482 Moreover, the sensitivity of both single mutants to ionizing radiation is greater in the non-interhomolog  
483 window than in the interhomolog window (Figure 4A). This result demonstrates that meiotic cells are  
484 more dependent upon these complexes to resolve DSBs when the homolog is unavailable as a repair  
485 template.

486         At 2500 Rad of ionizing radiation, we found that mutation of both *smc-5* and *brc-1* differentially  
487 impacted radiation resilience within the interhomolog and non-interhomolog windows. In the  
488 interhomolog window, the *smc-5;brc-1* double mutant and *smc-5* single mutant gamma estimates  
489 overlap, indicating that loss of BRC-1 does not alter *smc-5* mutant sensitivity at this timepoint (Figure  
490 4A). Further, *brc-1* mutant gamma estimates are indistinguishable from wild type within the  
491 interhomolog window (Figure 4A); therefore, the absence of an interaction may reflect the

## Figure 4

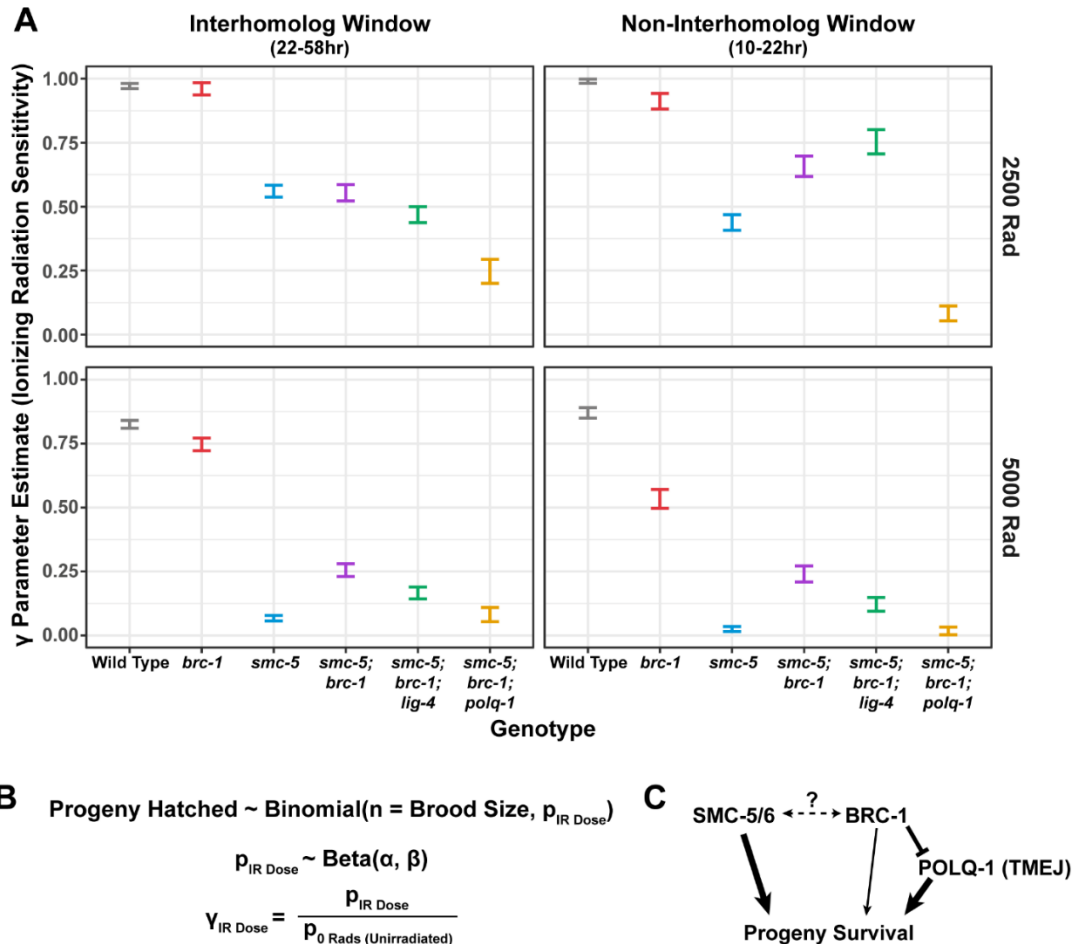

492

493 **Figure 4. Interactions of SMC-5/6 and BRC-1 in meiotic DSB repair following irradiation.** A) Gamma  
 494 parameter estimates of genotype sensitivity to ionizing radiation of given doses. Vertical error bars  
 495 represent the 95% credible interval of the gamma estimate for each genotype at the given dose of  
 496 irradiation exposure. The brood viabilities of hermaphrodites used in this analysis are displayed in  
 497 Supplemental Figure 4A and Supplemental Figure 4 source data 1. B) Outline of beta binomial model  
 498 framework used to generate panel A. See Methods for details. C) Genetic interaction diagram inferred  
 499 from estimates presented in panel A. SMC-5/6 and BRC-1 both contribute to progeny viability following  
 500 meiotic exposure to exogenous DSBs. However, BRC-1 also inhibits error prone repair, which can  
 501 compensate for the DSB defects of *smc-5* mutants when *brc-1* is also ablated.

502 **Figure 4 source code 1. The source code for Figure 4a is provided.** [Figure 4 source code 1.R]. The R  
 503 code utilized in performing the hierarchical statistical modeling in Figure 4a is provided. Code generating  
 504 the posterior simulations displayed in Supplemental Figure 4B is also provided in this R script.

505 **Figure 4 source code 2. The Rstan model fit for Figure 4a is provided.** [Figure 4 source code 2.rds]. The  
 506 RStan output from the code in Figure 4 source data 1 is provided.

507 **Figure 4 source data 1. The parameter estimates for Figure 4a are provided.** [Figure 4 source data  
 508 1.xlsx] Summary statistics of the posterior probability distributions for the  $p$ ,  $\alpha$ , and  $\beta$  parameters



509 and the gamma metric are listed. Statistics included are the mean, standard error of the mean  
510 (se\_mean), standard deviation (sd), credible interval boundaries (2.5%, 25%, 50%, 75%, 97.5%), effective  
511 sample size (n\_eff), and the MCMC chain equilibrium metric  $\hat{R}$  (Rhat).

512

513 dispensability of BRC-1 in early prophase I for progeny survival when DNA damage levels are not  
514 extreme. In the non-interhomolog window, however, we observe a striking resilience to exogenous DSBs  
515 in *smc-5;brc-1* double mutants as compared to *smc-5* single mutants (Figure 4A). This synthetic  
516 resilience is recapitulated across meiotic prophase I at 5000 Rads of ionizing radiation in *smc-5;brc-1*  
517 double mutants (Figure 4A). Thus, our data indicates that DNA damage sensitivity observed in *smc-5*  
518 mutants is enhanced by BRC-1-mediated functions.

519 BRC-1 is known to repress both TMEJ and NHEJ in multiple organisms, including *C. elegans*  
520 (Huen *et al.* 2010; Li *et al.* 2020; Kamp *et al.* 2020). We hypothesized that error prone repair pathways  
521 may be activated in *smc-5;brc-1* double mutants to resolve DSBs and abrogate the DNA repair defects  
522 associated with *smc-5* mutation. To test whether TMEJ and/or NHEJ contribute to the ionizing radiation  
523 resilience observed in *smc-5;brc-1* double mutants, we created *smc-5;brc-1;polq-1* and *smc-5;brc-1;lig-4*  
524 triple mutants which are defective in TMEJ and NHEJ respectively. We observed a striking effect at all  
525 radiation doses and timepoints scored in a *smc-5;brc-1;polq-1* mutant as compared to the *smc-5;brc-1*  
526 mutant. Even at the moderate dose of 2500 Rads, loss of POLQ-1 caused dramatic sensitization of *smc-*  
527 *5;brc-1* mutants to ionizing radiation (Figure 4A). This effect was particularly strong in the non-  
528 interhomolog window, where *smc-5;brc-1;polq-1* mutants were nearly sterile following ionizing  
529 radiation treatment regardless of irradiation dose (Figure 4A). Previous irradiation studies have shown  
530 that neither *polq-1* nor *brc-1;polq-1* mutation confer as severe of a radiation sensitivity phenotype as we  
531 observe in the *smc-5;brc-1;polq-1* triple mutant (Bae *et al.* 2020; Kamp *et al.* 2020). These results  
532 strongly indicate that *smc-5;brc-1* deficient germ cells exposed to exogenous DNA damage are  
533 dependent upon TMEJ for fertility.

### Supplemental Figure 4

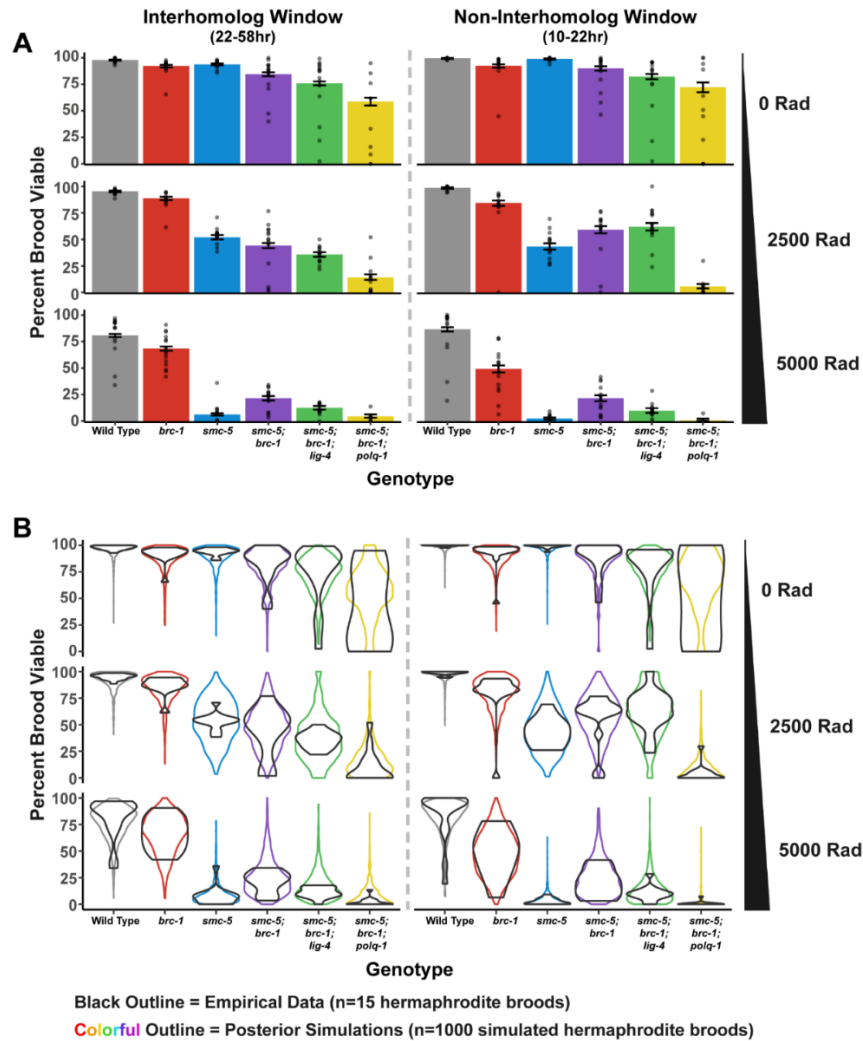

534

535 **Supplemental Figure 4. Brood viability results following irradiation.** A) Brood viability results following  
 536 irradiation at doses of 0, 2500, or 5000 Rads. Bars represent the population brood viability, while points  
 537 represent the brood viabilities of individual hermaphrodites scored. Error bars indicate 95% Binomial  
 538 confidence intervals of the population brood viability. B) Violin plots of empirical brood viabilities from  
 539 individual hermaphrodites scored (displayed as points in A) and posterior simulations from the Beta-  
 540 Binomial model fit to the data (Figure 4A, see Methods). In all panels, vertical dashed grey lines separate  
 541 interhomolog (22-58hr post heat shock) and non-interhomolog window (10-22hr post heat shock)  
 542 timepoints.

543 **Supplemental Figure 4 source data 1. The source data for Supplemental Figure 4 is provided.**  
 544 [Supplemental Figure 4 source data 1.xlsx]. The number of hatched (Live), unhatched (Dead), or  
 545 unfertilized (Unf) F1 progeny scored in the brood viability experiment data used to generate Figure 1.  
 546 The number of progeny scored are separated by individual timepoints (Timept) for each parent scored  
 547 (Plate\_ID). Experimental replicates are delineated by the date of irradiation treatment (IR\_date). Wild  
 548 type and *smc-5(ok2421)* data is shared with Supplemental Figure 6.

549           In contrast to the dramatic effects on DSB repair produced in our *smc-5;brc-1;polq-1* mutant, we  
550 found that *smc-5;brc-1;lig-4* mutants exhibited only mild effects on radiation sensitivity compared to the  
551 *smc-5;brc-1* double mutant alone (Figure 4A). As loss of *lig-4* did not fully suppress the synthetic  
552 radiation resilience of *smc-5;brc-1* mutants, our experiments suggest that NHEJ is not a primary  
553 mechanism of DNA repair in meiotic nuclei when both SMC-5/6 and BRC-1 are lost. Taken together, the  
554 results of our irradiation analysis indicate that both SMC-5/6 and BRC-1 contribute to gamete viability  
555 following ionizing radiation treatment, with loss of SMC-5/6 having far greater consequences for the  
556 gamete than loss of BRC-1 (Figure 4C). As *brc-1* mutation confers synthetic resilience to radiation in *smc-*  
557 *5* mutants, we provide evidence that some functions of BRC-1 contribute to the meiotic DSB repair  
558 defects associated with *smc-5* mutation (Figure 4C). Further, we find that TMEJ is vital to radiation  
559 resilience in *smc-5;brc-1* mutants, suggesting that this pathway compensates for the DNA repair  
560 deficiencies incurred when SMC-5/6 and BRC-1 are both lost (Figure 4C). Repression of TMEJ by BRC-1  
561 may therefore be deleterious to reproductive success in *smc-5* mutants by enabling more severe DNA  
562 repair errors to occur.

### 563 **BRC-1 localization is independent of SMC-5/6**

564           To determine whether there is a co-dependency between BRC-1 and SMC-5/6 for localization,  
565 we first examined GFP::*BRC-1* by immunofluorescence in both wild type and *smc-5* mutant germlines.  
566 Similar to previous studies (Janisiw *et al.* 2018; Li *et al.* 2018), we observed that BRC-1 localizes as a  
567 nuclear haze in the premeiotic tip through early pachytene and becomes associated with the  
568 synaptonemal complex during the progression of pachytene in wild type germlines (Supplemental Figure  
569 5). In late pachytene, BRC-1 relocates to the short arms of the bivalents, where it can be visualized at  
570 diplotene as short tracks on the compacted chromosome arms (Supplemental Figure 5). When we  
571 examined *smc-5* mutants, the general pattern of GFP::*BRC-1* localization across meiotic prophase was

## Supplemental Figure 5

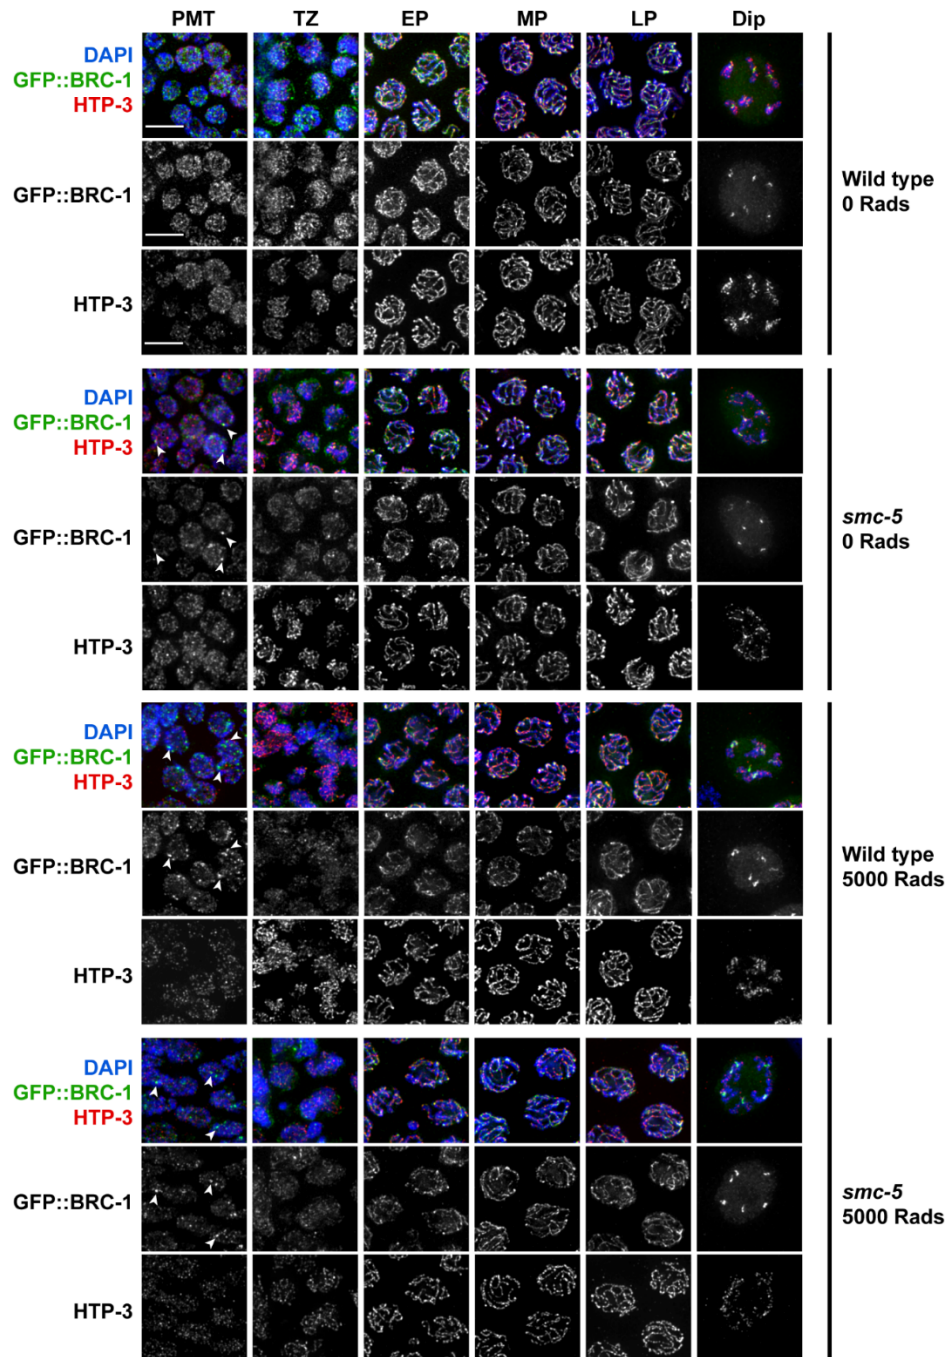

572

573 **Supplemental Figure 5. SMC-5/6 is not required for GFP::BRC-1 localization.** Deconvolved widefield  
 574 images of germline nuclei stained for GFP (GFP::BRC-1), chromosome axis protein HTP-3, and DAPI  
 575 (DNA) in a wild type or *smc-5(ok2421)* mutant background and treated with 0 or 5000 Rads of ionizing  
 576 radiation. Scale bars represent 5 $\mu$ m. Stages of meiotic nuclei were determined based on DAPI  
 577 morphology and are listed on the top of the figure (PMT = premeiotic tip, TZ = transition zone, EP = early  
 578 pachytene, MP = mid pachytene, LP = late pachytene, Dip = Diplotene). Arrowheads indicate GFP::BRC-1  
 579 foci.

580 similar to wild type, except in the premeiotic tip where GFP::BRC-1 formed bright foci (Supplemental  
581 Figure 5). Given that BRD-1, the obligate heterodimeric partner of BRC-1, was found to form a similar  
582 localization in *smc-5* mutants (Wolters *et al.* 2014), the bright GFP::BRC-1 foci in the pre-meiotic tip  
583 likely mark BRC-1 localization to collapsed replication forks (Bickel *et al.* 2010; Wolters *et al.* 2014). Our  
584 data therefore indicate normal localization of BRC-1 does not require SMC-5/6.

585 To assess if BRC-1 changes localization in response to exogenous DSBs, we exposed wild type  
586 and *smc-5* mutant germlines to 5000 Rads of ionizing radiation and again examined germline GFP::BRC-1  
587 by immunofluorescence. We found that the general pattern of GFP::BRC-1 localization appeared normal  
588 in both wild type and *smc-5* mutants following irradiation (Supplemental Figure 5). Taken together, our  
589 results suggest that BRC-1 localization is not altered following the induction of exogenous DSBs even  
590 when SMC-5/6 complex function is lost.

#### 591 **SMC-5/6 localization is independent of BRC-1**

592 To determine whether SMC-5/6 localization is dependent upon BRC-1, we generated an  
593 endogenous *smc-5* allele which codes for the auxin-inducible degron (AID\*) and 3xFLAG epitope tags on  
594 the C terminus (*smc-5(syb3065[AID\*::3xFLAG])*). The *smc-5(syb3065)* allele did not confer sensitivity to  
595 ionizing radiation nor an alteration in RAD-51 loading, suggesting that the tag does not impair SMC-5/6  
596 complex function (Supplemental Figures 6A and 7). We examined the localization of SMC-  
597 5::AID\*::3xFLAG in both wild type and *brc-1* mutants (Supplemental Figure 6B). We observed that,  
598 similar to a prior study (Bickel *et al.* 2010), SMC-5/6 is present in meiotic nuclei throughout prophase I.  
599 Notably, we found that SMC-5 staining in early and mid-pachytene was primarily localized to the  
600 chromosome axis, marked with HTP-3 (Supplemental Figure 6B; see Methods). This localization pattern  
601 was altered in the transition to diplotene, when we observed that SMC-5 localizes to the chromatin on  
602 the compacting bivalent chromosomes, matching previous analyses (Supplementary Figure 6B)

**Supplemental Figure 6**

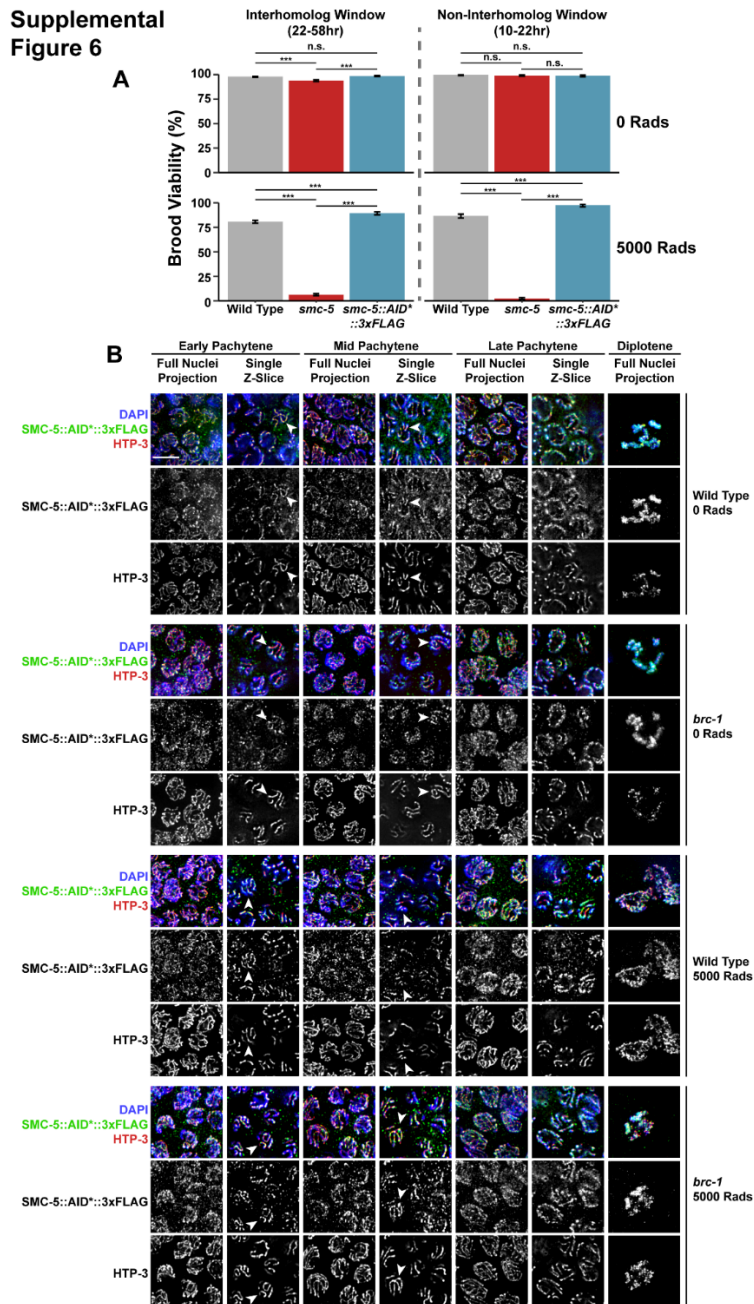

603

604 **Supplemental Figure 6. BRC-1 is not required for SMC-5::AID\*::3xFLAG localization.** A) Brood viability  
605 of wild type, *smc-5(ok2421)*, and *smc-5(syb3065)* hermaphrodites exposed to 0 or 5000 Rads of ionizing  
606 radiation. Bars represent the population brood viability of each strain. P values were calculated by  
607 Fisher's Exact Test (n.s. = not significant  $p > 0.05$ , \*\*\*  $p < 0.001$ ). Error bars represent the 95% Binomial  
608 confidence interval of the brood viability estimate. B) Deconvolved images of germline nuclei stained for  
609 AID\* (SMC-5::AID\*::3xFLAG), chromosome axis protein HTP-3, or DAPI (DNA) in a wild type or *brc-*  
610 *1(xoe4)* mutant background and treated with 0 or 5000 Rads of ionizing radiation. Scale bars represent  
611 5 $\mu$ m. Stages of meiotic nuclei are determined based on DAPI morphology and are listed at the top of the  
612 figure. For each image, a max intensity projection of whole nuclei and single z-slices are displayed to  
613 demonstrate the relative localization of SMC-5 and HTP-3. Arrowheads indicate examples of  
614 colocalization between HTP-3 and SMC-5::AID\*3xFLAG.

615 **Supplemental Figure 6 source data 1. The source data for Supplemental Figure 6A is provided.**  
616 [Supplemental Figure 6 source data 1.xlsx]. The number of hatched (Live), unhatched (Dead), or  
617 unfertilized (Unf) F1 progeny scored in the brood viability experiment data used to generate Figure 1.  
618 The number of progeny scored are separated by individual timepoints (Timept) for each parent scored  
619 (Plate\_ID). Experimental replicates are delineated by the date of irradiation treatment (IR\_date). Wild  
620 type and *smc-5(ok2421)* data is shared with Supplemental Figure 4.

621  
622  
623

### Supplemental Figure 7

*smc-5::AID\*::3xFLAG*

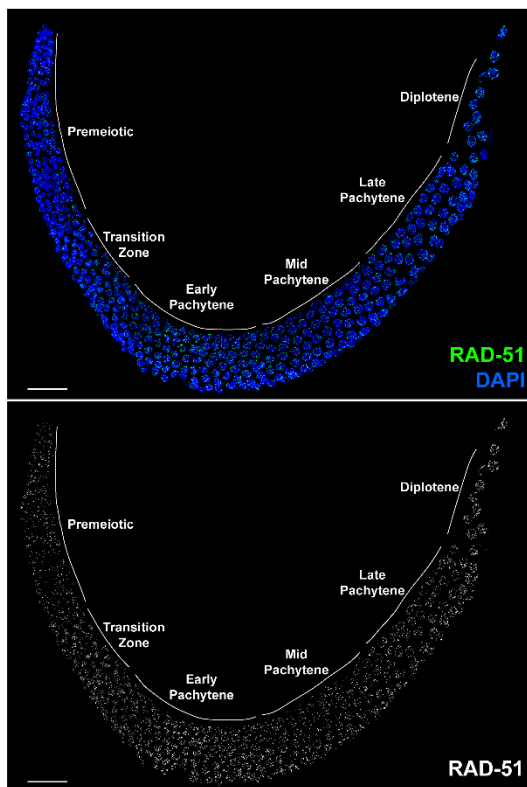

*smc-5::AID\*::3xFLAG; brc-1(xoe4)*

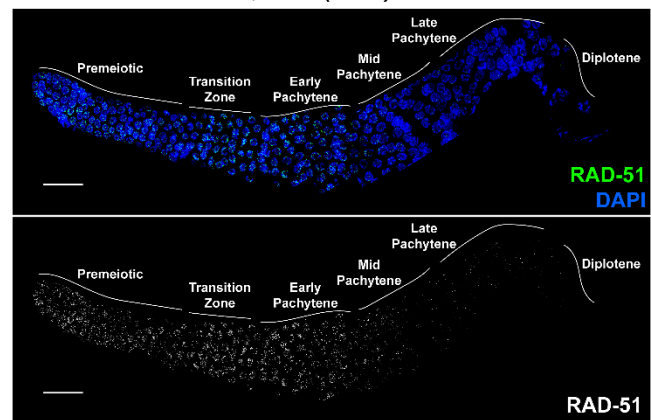

*brc-1(xoe4)*

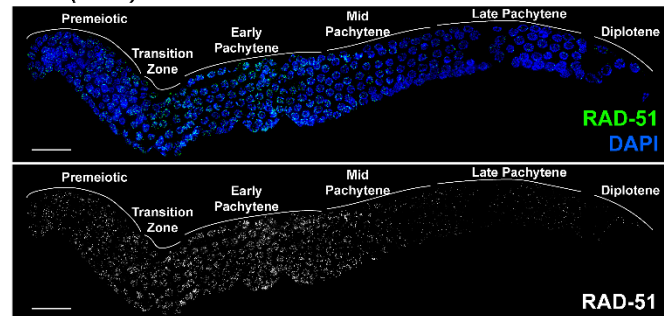

624

625 **Supplemental Figure 7. SMC-5::AID\*::3xFLAG does not inhibit RAD-51 localization to irradiation-**  
626 **induced DSBs.** Deconvolved images of whole extruded germlines stained for RAD-51 and DAPI. All  
627 germlines were exposed to 5000 Rads of ionizing radiation and were dissected within 1 hour of the  
628 radiation treatment. Loss of *brc-1* impedes RAD-51 localization in mid/late pachytene (Janisiw *et al.*  
629 2018; Li *et al.* 2018), and this phenotype is not recapitulated nor enhanced by the *smc-5(syb3065)* allele.  
630 Grey lines and labels demarcate the mitotic and meiotic stages of the germline. Scale bars represent  
631 20µm.

632 (Bickel *et al.* 2010). The pattern of SMC-5 localization was not disrupted in a *brc-1* mutant, and similarly  
633 was not altered following exposure to 5000 Rads of ionizing radiation (Supplementary Figure 6B). Thus,  
634 the localization of SMC-5/6 does not depend upon the activity of BRC-1 and is not altered following  
635 induction of exogenous DNA damage at the levels we tested.

636

## 637 **Discussion**

638 Meiotic cells must coordinate DNA repair pathway engagement to ensure both formation of  
639 interhomolog crossovers and repair of all DSBs. The highly conserved proteins SMC-5/6 and BRC-1  
640 promote accurate DSB repair, but the specific DNA repair outcomes that these proteins regulate have  
641 remained unclear. We find that SMC-5/6 and BRC-1 both act to repress intersister crossovers, and  
642 further demonstrate that BRC-1 specifically influences noncrossover intermediate processing. We also  
643 observe that mutants for *brc-1* incur DNA repair defects at mid pachytene, as evidenced by increased  
644 engagement of error prone repair pathways. By comparing the germ cell resilience of *smc-5*, *brc-1*, and  
645 *smc-5;brc-1* mutants to ionizing radiation, we show that SMC-5/6 and BRC-1 are especially important for  
646 DSB repair in late meiotic prophase I. Further, we reveal that BRC-1 enhances the meiotic DNA repair  
647 defects of *smc-5* mutants and provide evidence that this interaction is in part underpinned by BRC-1  
648 dependent repression of TMEJ. Taken together, our study illuminates specific functions and interactions  
649 of highly conserved DNA repair complexes in promoting germline genome integrity.

## 650 **Functions of BRC-1 in *C. elegans* meiotic DNA repair**

651 The work presented in this study demonstrates that meiotic cells deficient in BRC-1 exhibit  
652 multiple DNA repair defects, including reduced noncrossover conversion tract length, elevated rates of  
653 intersister crossovers, and engagement of error prone DSB repair mechanisms at the mid-pachytene  
654 stage. What functions of BRC-1 may underpin these phenotypes? Accumulating evidence in other model



655 systems supports roles for BRCA1 in regulating many early steps in recombination including DSB  
656 resection, strand invasion, and D-loop formation (Chen *et al.* 2008; Chandramouly *et al.* 2013; Cruz-  
657 García *et al.* 2014; Zhao *et al.* 2017; Kamp *et al.* 2020). We propose that perhaps some of these  
658 functions of BRC-1 are conserved in *C. elegans*.

659         While a growing body of research in budding yeast, mammalian systems, and *Arabidopsis*  
660 suggests that SDSA is the primary pathway for the formation of noncrossovers in meiosis (Hunter 2015;  
661 Marsolier-Kergoat *et al.* 2018; Ahuja *et al.* 2021) and that processing of joint molecular intermediates  
662 can generate noncrossovers during *Drosophila* meiosis (Crown *et al.* 2014), the mechanisms by which *C.*  
663 *elegans* noncrossover recombination occurs is unknown. Using the ICR assay, we find that the *brc-1*  
664 mutation affects the extent of ICR assay noncrossover gene conversion, but not crossover gene  
665 conversion, suggesting that homolog-independent noncrossovers arise from a distinct intermediate or  
666 undergo differential processing from crossovers in *C. elegans*. This result is consistent with a model in  
667 which either SDSA or joint molecule dissolution is a primary mechanism of intersister noncrossover  
668 recombination in the *C. elegans* germline (Figure 5).

669         The size of an SDSA or dissolution of a noncrossover conversion tract depends upon the extent  
670 of heteroduplex DNA present following strand annealing, which is primarily determined by the length of  
671 DNA strand extension (Keelagher *et al.* 2011; Guo *et al.* 2017; Marsolier-Kergoat *et al.* 2018). Human  
672 BRCA1 promotes strand invasion and D-loop formation (Zhao *et al.* 2017), which may influence the  
673 efficiency of strand extension. Our conversion tract data raises the possibility that BRC-1 influences the  
674 formation and/or stability of strand invasion intermediates, thereby promoting the formation of long  
675 ICR assay noncrossover gene conversion events (Figure 5).

676

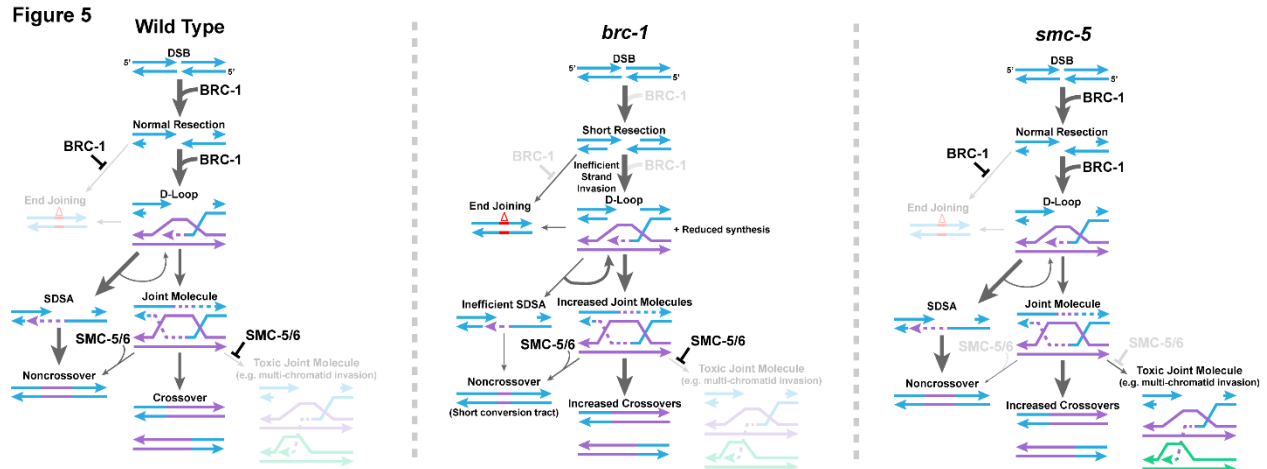

677

678 **Figure 5. Model of BRC-1 and SMC-5/6 function in *C. elegans* intersister DSB repair.** Displayed is a  
 679 proposed model for the functions of BRC-1 and SMC-5/6 in regulating intersister DSB repair in the *C.*  
 680 *elegans* germline. Under wild type conditions, BRC-1 promotes efficient resection of the damaged  
 681 chromatid (blue) and facilitates strand invasion and extension with the sister chromatid (purple). BRC-1  
 682 also inhibits TMEJ either through direct antagonism of this pathway or indirectly by promoting efficient  
 683 recombination. Following strand extension, the majority of D-loop intermediates are dissolved and  
 684 repaired through SDSA, which is efficient due to BRC-1 promoted resection of the second end of the  
 685 DSB. A minority of D-loops will proceed to form joint molecules, which may potentially be preferentially  
 686 resolved as noncrossovers via the action of SMC-5/6 or as crossovers in an SMC-5/6 independent  
 687 manner. In addition, SMC-5/6 inhibits the formation of toxic joint molecule intermediates, such as multi-  
 688 chromatid joint molecules. In a *brc-1* mutant, DSBs are not resected to wild type levels and strand  
 689 invasion is inefficient. Reduced resection limits the efficiency of second end capture in SDSA, reducing  
 690 noncrossovers through this pathway. Further, limited strand extension reduces the extent of gene  
 691 conversion in noncrossovers generated by successful SDSA or joint molecule dissolution. Failure in SDSA  
 692 leads to increased DSB reinvasion of repair templates, contributing to the tandem duplications observed  
 693 in mutants for BRCA1 (Chandramouly *et al.* 2013; Kamp *et al.* 2020). In addition, either due to absence  
 694 of direct inhibition by BRC-1 or inefficiencies in recombination, end joining (particularly TMEJ) becomes  
 695 activated to resolve DSBs. However, reduced resection does not inhibit joint molecule formation,  
 696 leading to more of these intermediates which are preferentially resolved as crossovers. Finally, in an  
 697 *smc-5* mutant, early steps in DSB repair proceed normally. However, absence of SMC-5/6 results in  
 698 unconstrained joint molecule formation, including toxic intermediates. Failure in SMC-5/6 action to  
 699 promote noncrossover repair further increases the proportion of joint molecules which are resolved as  
 700 crossovers.

701 Our data also demonstrate that *brc-1* mutants exhibit elevated intersister crossovers. If BRC-1  
702 only functions to promote strand invasion and D-loop formation, then we expected *brc-1* mutation to  
703 reduce intersister crossovers and not increase their occurrence. Previous studies have also suggested  
704 that BRCA1/BRC-1 regulates DSB resection, and we propose that this function better accounts for the  
705 observed increase in intersister crossovers (Chen *et al.* 2008; Cruz-García *et al.* 2014). Specifically,  
706 studies have posited that BRCA1-promoted long range DSB resection may be important for the  
707 efficiency of SDSA by ensuring sufficient single stranded DNA is exposed on the second end of the DSB to  
708 facilitate strand annealing (Chandramouly *et al.* 2013; Kamp *et al.* 2020). While sufficient resection may  
709 be critical in resolving noncrossovers, work in budding yeast has shown that long range resection is not  
710 required for the efficient formation of joint molecules (Zakharyevich *et al.* 2010). Thus, reduced length  
711 of DNA resection due to a *brc-1* mutation may impede SDSA and therefore increase the probability that  
712 DSBs will form joint molecule intermediates, thereby promoting intersister crossover outcomes.

713 Reduced resection in conjunction with inefficient strand invasion and synthesis during  
714 recombination may further explain the ectopic engagement of TMEJ observed in *brc-1* mutants (Kamp *et al.*  
715 *et al.* 2020). Short range resection provides sufficient substrate for TMEJ (Ramsden *et al.* 2022), which in  
716 combination with inefficient homology search may provide more opportunity for TMEJ engagement.  
717 BRC-1 is also required in late meiotic prophase I for the loading and/or maintenance of RAD-51 at  
718 irradiation induced DSBs (Janisiw *et al.* 2018; Li *et al.* 2018). Defects in RAD-51 localization may further  
719 exacerbate the likelihood of error prone DSB repair at these meiotic stages. Overall, our data is  
720 consistent with a model in which BRC-1 promotes multiple DSB repair steps, including resection and the  
721 formation of early strand invasion intermediates, to facilitate intersister noncrossover repair (Figure 5).

722

## 723 **Functions of SMC-5/6 in *C. elegans* meiotic DSB repair**

724 Our experiments demonstrate that SMC-5/6 acts to repress intersister crossover recombination  
725 in the early stages of meiotic prophase I. We do not find evidence, however, of prominent roles for  
726 SMC-5/6 in regulating ICR assay conversion tracts nor limiting error prone repair outcomes. These  
727 relatively subtle phenotypes appear at first incongruous with the known severe defects associated with  
728 loss of SMC-5/6 in *C. elegans*, which include chromosome fragmentation, large mutations, and  
729 transgenerational sterility (Bickel *et al.* 2010; Volkova *et al.* 2020). The ICR and IH assay experiments,  
730 however, are limited to the detection of DSB repair outcomes which encode a functional protein  
731 product. Thus, many of the severe mutations associated with SMC-5/6 deficiency may disrupt the coding  
732 sequence in the ICR or IH assays and therefore escape our detection (Volkova *et al.* 2020).

733 In budding yeast, Smc5/6 prevents the accumulation of toxic interchromosomal attachments  
734 and recombination intermediates (Chen *et al.* 2009; Xaver *et al.* 2013; Lilienthal *et al.* 2013; Copsey *et al.*  
735 2013; Bonner *et al.* 2016; Peng *et al.* 2018) Prior evidence in *C. elegans* suggests that some of these  
736 functions are likely conserved, as double mutants for *smc-5* and the BLM helicase homolog *him-6* are  
737 sterile and display chromatin bridges indicative of persistent interchromosomal attachments (Hong *et al.*  
738 2016). This synthetic phenotype suggests that these two complexes act in parallel to prevent the  
739 accumulation of joint molecules. A previous study (Almanzar *et al.* 2021) and the data we present here  
740 reveal that both SMC-5/6 and HIM-6 repress intersister crossovers. The synthetic sterility associated  
741 with loss of both SMC-5/6 and HIM-6 then may be a product of parallel functions for these proteins in  
742 limiting and/or resolving joint molecules. Although BLM is known to play multiple roles in regulating  
743 recombination, a core function of this helicase is in antagonism of joint molecule formation and  
744 promotion of noncrossover recombination (McVey *et al.* 2004; Weinert and Rio 2007; Schvarzstein *et al.*  
745 2014). SMC-5/6 in *C. elegans* meiosis may therefore act as a second line of defense to ensure the  
746 elimination of inappropriate joint molecule intermediates which have formed more stable

747 configurations (Figure 5). Under this model, we would expect accumulation of intersister joint molecules  
748 in an *smc-5* mutant and therefore elevated intersister crossovers, as observed in our *smc-5* ICR assay  
749 and EdU labeling experiments. Our observation that *smc-5* mutation does not alter ICR assay conversion  
750 tracts is also consistent with a model in which SMC-5/6 influences recombination following joint  
751 molecule formation. While the specific mechanisms by which SMC-5/6 may influence recombination  
752 intermediate formation or resolution remain unclear, recent work has shown that SMC-5/6 is capable of  
753 DNA loop-extrusion, indicating a function by which the complex may organize chromatin to facilitate  
754 efficient DSB repair (Pradhan *et al.* 2022). Specific subunits of SMC-5/6 also exhibit enzymatic function,  
755 such as the E3 SUMO ligase Nse2/Mms21 (Andrews *et al.* 2005), suggesting that SMC-5/6 may act to  
756 postranslationally modify target proteins to regulate DNA repair. Taken together, our data indicates that  
757 SMC-5/6 is not required for homolog-independent meiotic recombination and instead reveals a function  
758 for this complex in limiting crossover exchanges between sister chromatids.

### 759 **Temporal regulation of error-prone meiotic DSB repair**

760 In both the ICR and IH assays we performed in *brc-1* mutants and in the IH assay we performed  
761 in *smc-5* mutants, we identified mutagenic repair events specifically at the 22-34hr timepoint,  
762 corresponding to oocytes in mid pachytene at the time of Mos1-excision induced DSB formation.  
763 Further, the repair events we identified frequently displayed microhomologies flanking the deletion site  
764 – a characteristic signature of TMEJ. While our dataset cannot definitively demonstrate that these  
765 events are the product of TMEJ, previous evidence and the nature of the break repair products strongly  
766 suggest that they originate from this pathway (Kamp *et al.* 2020). The limited temporal window in which  
767 we identified these events suggests that the activity of TMEJ may be relegated to later stages of meiotic  
768 prophase I. There are a number of important events which coincide at the mid/late pachytene transition  
769 of *C. elegans* meiosis, including a MAP kinase phosphorylation cascade, designation of interhomolog  
770 crossovers, a switch from RAD-50 dependence to independence for loading of RAD-51 to resected DNA,

771 and loss of access to the homolog as a ready repair template (Church *et al.* 1995; Kritikou *et al.* 2006;  
772 Hayashi *et al.* 2007; Lee *et al.* 2007; Rosu *et al.* 2011; Yokoo *et al.* 2012; Nadarajan *et al.* 2016). These  
773 events may correspond to a switch in cellular “priorities” from ensuring interhomolog recombination to  
774 promoting repair of all residual DSBs even through error prone mechanisms. By repairing all residual  
775 DSBs (even in the wake of sequence errors), germ cells avoid catastrophic chromosome fragmentation  
776 during the meiotic divisions.

777         During the mid to late pachytene transition, an important function of BRC-1 (and to a lesser  
778 extent SMC-5/6) may be to prevent TMEJ either by antagonizing this pathway or facilitating efficient  
779 recombination. Our irradiation experiments revealed that both *brc-1* and *smc-5* mutant oocytes exhibit  
780 greater sensitivity to exogenous DNA damage in late stages of prophase I, suggesting that cellular  
781 requirements for efficacious DSB repair change during the transition to late pachytene. Moreover,  
782 during the late pachytene stage, several changes regarding BRC-1 occur: 1) BRC-1 protein localization  
783 changes; and, 2) BRC-1 is required to load (and/or stabilize) RAD-51 filaments (Janisiw *et al.* 2018; Li *et*  
784 *al.* 2018). We found that *brc-1* mutants incur mutations with characteristic TMEJ signatures specifically  
785 at the mid/late pachytene stage, suggesting that the changes in BRC-1 localization and function at this  
786 stage may coincide with changes in the availability and/or regulation of error prone repair mechanisms.  
787 Our irradiation experiments demonstrated that *smc-5;brc-1* double mutant oocytes throughout  
788 prophase I are dependent upon TMEJ DNA polymerase  $\theta$  homolog *polq-1* for viability. If BRC-1 functions  
789 which repress TMEJ (Kamp *et al.* 2020) are specific to late prophase, then this result suggests that many  
790 DSBs in *smc-5;brc-1* mutants induced in early prophase may not be repaired until mid/late pachytene,  
791 when TMEJ is active. Spatiotemporal transcriptomic analysis has shown that *polq-1* is expressed  
792 throughout meiotic prophase I (Tzur *et al.* 2018). As we only identified error-prone resolution of DSBs  
793 induced at mid pachytene, our findings raise the possibility that BRC-1 independent mechanisms may  
794 repress TMEJ in early/mid pachytene. Our results in *brc-1* mutants therefore lay the groundwork for

795 future research delineating the temporal regulation of error-prone meiotic DSB repair. Taken together,  
796 our study reveals that the engagement of error-prone and recombination DSB repair pathways are  
797 differentially regulated during the course of *C. elegans* meiotic prophase I.

#### 798 **Interaction between BRC-1 and SMC-5/6 in meiotic DNA repair**

799 Our irradiation experiments assessing the viability of *smc-5*, *brc-1*, and *smc-5;brc-1* mutant  
800 oocytes reveal that functional BRC-1 enhances the DNA repair defects of *smc-5* mutants. By further  
801 ablating error prone repair pathways, we also demonstrated that *smc-5;brc-1* mutants are dependent  
802 upon TMEJ for viability following irradiation. However, this genetic interaction does not coincide with  
803 changes in either SMC-5/6 or BRC-1 localization in respective mutants. Taken together, we suggest that  
804 the observed genetic relationships between BRC-1 and SMC-5/6 are likely not derived from direct  
805 physical interactions between these complexes, nor action on shared substrates, but rather arise from  
806 their respective sequential roles in regulation of DSB repair. A similar model was proposed by Hong *et al.*  
807 2016 which postulated that early recombination defects in *brc-1* mutants may alleviate the toxic  
808 recombination intermediates formed in *smc-5;him-6* double mutants. We expand upon this model to  
809 demonstrate that this genetic relationship observed in *smc-5;him-6;brc-1* mutants is recapitulated in  
810 *smc-5;brc-1* double mutants, indicating that this interaction is not unique to the triple mutant context.

811 How might DNA repair defects in *brc-1* mutants ameliorate genomic instability associated with  
812 *smc-5* mutation? If *smc-5* mutants accumulate toxic joint molecules, then we would expect deficiencies  
813 in earlier recombination steps to limit the formation of these problematic intermediates and therefore  
814 alleviate the effects of *smc-5* mutation. Our analysis of homolog independent recombination in *brc-1*  
815 mutants revealed phenotypes which are consistent with this protein regulating both DSB resection and  
816 strand invasion. Work in budding yeast has shown that the additional ssDNA generated by long range  
817 resectioning of a DSB is used for homology search (Chung *et al.* 2010). Inefficient resection in *brc-1*

818 mutants may reduce the extent of homology which could anneal to heterologous templates and  
819 contribute to toxic joint molecules (Figure 5). Conversely, resection defects of *brc-1* mutants could  
820 increase the risk for toxic recombination intermediates in *smc-5* mutants by limiting the efficiency of  
821 SDSA and therefore biasing DSBs to form joint molecules. However, compromised strand invasion and D-  
822 loop formation in *brc-1* mutants could also limit the capacity for DSBs to form multi-chromatid  
823 engagements. Finally, increased TMEJ activity in *smc-5;brc-1* mutants could resolve DSBs before they  
824 form recombination intermediates, thereby bypassing requirements for SMC-5/6 in DSB repair. In  
825 summation, our study reveals an interplay between BRC-1 and SMC-5/6 in regulating meiotic DSB repair.

826

## 827 **Acknowledgements**

828 We thank the CGC (funded by National Institutes of Health P40 OD010440) for providing strains. We also  
829 thank J. Engebrecht for generously sharing strains carrying the *brc-1(xoe4)* and *GFP::brc-1* alleles. We  
830 thank C. Cahoon, A. Naftaly, and N. Kurhanewicz for thoughtful comments on this manuscript. We also  
831 thank G. Csankovszki for sharing antibodies for SMC-5 and SMC-6. This work was supported by the  
832 National Institutes of Health T32GM007413 and Advancing Science in America (ARCS) Foundation Award  
833 to E.T; National Institutes of Health R25HD070817 to A.S.; Genetics Training Grant 5T32M007464-42 to  
834 D.E.A.; a Pilot Project Award from the American Cancer Society, R35GM128804 grant from NIGMS, and  
835 start-up funds from the University of Utah to O.R.; and National Institutes of Health R00HD076165 and  
836 R35GM128890 to D.E.L. D.E.L. is also a recipient of a March of Dimes Basil O'Connor Starter Scholar  
837 award and Searle Scholar Award.

## 838 **Competing Interests**

839 The authors declare no conflicts of interest.



840 **Materials and Methods**

841 ***Caenorhabditis elegans* strains and maintenance**

842 *Caenorhabditis elegans* strains were maintained at 15°C or 20°C on nematode growth medium (NGM)  
843 plates seeded with OP50 bacteria. All experiments were performed in the N2 genetic background of *C.*  
844 *elegans* and animals were maintained at 20°C for at least two generations preceding an experiment.

845 Strains used in this study include:

846 N2 (wild type)

847 AV554 (*dpy-13(e184sd) unc-5(ox171::Mos1)/ nT1 (qls51) IV; Krls14 (phsp-*  
848 *16.48::MosTransposase; lin-15B; punc-122::GFP) / nT1 (qls51) V*)

849 CB791 (*unc-5(e791) IV*),

850 DLW14 (*unc-5(lib1[ICR assay pmyo-3::GFP(-); unc-119(+); pmyo-2::GFP(Mos1)]) IV; Krls14 (phsp-*  
851 *16.48::MosTransposase; lin-15B; punc-122::GFP) V*)

852 DLW23 (*smc-5(ok2421)/mIn1 [dpy-10(e128) mls14] II; unc-5(lib1[ICR assay pmyo-3::GFP(-); unc-*  
853 *119(+); pmyo-2::GFP(Mos1)]) IV; Krls14 (phsp-16.48::MosTransposase; lin-15B; punc-122::GFP*  
854 *V)*

855 DLW81 (*smc-5(ok2421)/mIn1[dpy-10(e128) mls14] II; unc-5(e791) IV*)

856 DLW131 (*smc-5(ok2421)/mIn1[dpy-10(e128) mls14] II; lig-4(ok716) brc-1(xoe4) III*)

857 DLW134 (*smc-5(ok2421)/mIn1[dpy-10(e128) mls14] II; polq-1(tm2572) brc-1(xoe4) III*)

858 DLW137 (*smc-5(ok2421)/mIn1 [mls14 dpy-10(e128)] II; brc-1(xoe4) III*)

859 DLW157 (*brc-1(xoe4) III; unc-5(e791) IV*)

860 DLW175 (*smc-5(syb3065 [::AID\*::3xFLAG]) II; brc-1(xoe4) III*)

861 DLW182 (*smc-5(ok2421)/mIn1[dpy-10(e128) mls14] II; GFP::brc-1 III*)

862 DLW202 (*smc-5(ok2421)/mIn1 [dpy-10(e128) mls14] II; dpy-13(e184sd) unc-5(ox171::Mos1) IV;*  
863 *Krls14 [phsp-16.48::MosTransposase; lin-15B?; punc-122::GFP] V*)

864 DLW203 (*brc-1(xoe4) III; dpy-13(e184sd) unc-5(ox171::Mos1) IV; Krls14 [phsp-*  
865 *16.48::MosTransposase; lin-15B; punc-122::GFP] V*)

866 JEL515 (*GFP::brc-1 III*)

867 JEL730 (*brc-1(xoe4) III*)

868 PHX3065 (*smc-5(syb3065 [::AID\*::3xFLAG]) II*)

869 YE57 (*smc-5(ok2421)/mIn1 [mIs14 dpy-10(e128)] II*)

870 Double and triple mutants which carried the *smc-5(ok2421)* and *brc-1(xoe4)* alleles incurred mutations  
871 within ~6-10 generations of propagation, as indicated by progeny with movement defects, body  
872 morphology defects, or the presence of male offspring. To minimize the risk of *de novo* suppressor or  
873 enhancer mutations influencing the phenotypes we observed in these mutants, we froze stocks of these  
874 double and triple mutants at -80°C within 3 generations of the strains' construction. All experiments  
875 using these strains were carried out on stocks which had been maintained for less than 1-2 months. If a  
876 strain began to segregate mutant phenotypes, a new isolate of the freshly generated strain was thawed  
877 from frozen stocks.

#### 878 **CRISPR/Cas9 genome editing**

879 CRISPR/Cas9 genome editing was performed by SUNY Biotech to generate the *smc-5(syb3065)* allele in  
880 which the endogenous sequence of *smc-5* is modified at its C terminus to code for both an AID\* tag  
881 (peptide sequence PKDPAKPPAKAQVVGWPPVRSYRKNVMVCKSSGGPEAAAFVK) and a 3xFLAG tag  
882 (peptide sequence DYKDHDGDYKDHDIDYKDDDDK). The coding sequence of *smc-5*, the AID\* tag, and the  
883 3xFLAG tag were respectively connected by flexible GAGS peptide linkers. The repair template for this  
884 insertion was synthesized as a single strand oligo and was injected with Cas9 enzyme and a single guide  
885 RNA targeting the 12<sup>th</sup> exon of the *smc-5* locus. Successful integration was confirmed by PCR and Sanger  
886 sequencing. CRISPR edited strains were backcrossed three times to N2 before experiments were  
887 performed.

#### 888 ***C. elegans* brood viability assays and Bayesian hierarchical modeling analysis**

889 L4 stage hermaphrodite nematodes of each genotype to be scored were isolated 16-18hrs before  
890 irradiation was to be performed and were maintained at 15°C on NGM plates seeded with OP50. These  
891 worms were then exposed to 0, 2500, or 5000 Rads of ionizing radiation from a Cs<sup>137</sup> source (University

892 of Oregon). Following irradiation, n=5 hermaphrodites of each genotype and treatment combination  
893 were placed onto individual NGM plates seeded with OP50 and were maintained at 20°C. At 10hrs,  
894 22hrs, and 46hrs post irradiation, the irradiated hermaphrodites were transferred to new NGM plates  
895 seeded with OP50. 58hrs after irradiation, the parent hermaphrodites were discarded. The proportion of  
896 F1 progeny which hatched, did not hatch ('dead eggs' indicating embryonic lethality), or were  
897 unfertilized on each plate was scored 36-48hrs after the removal of the parent hermaphrodite from a  
898 plate. The brood size of each hermaphrodite was calculated as (hatched progeny) + (dead eggs). Brood  
899 viability at each timepoint was calculated as (hatched progeny) / (brood size). Brood viability assays  
900 were performed in triplicate with the exception of *smc-5(syb3065)*, which was replicated twice with n=5  
901 hermaphrodites scored for each radiation treatment in each replicate.

902 Brood viabilities of individual hermaphrodites for each given genotype and irradiation treatment were  
903 analyzed using RStan (Stan Development Team 2021). The brood viability data of individual  
904 hermaphrodites (h) for each genotype (g), timepoint scored (t), and irradiation treatment (i) was fit to a  
905 Beta-Binomial model:

$$906 \quad \text{Hatched Progeny}_{g,t,i,h} \sim \text{Binomial}(n = \text{Brood size}_{g,t,i,h}, p_{g,t,i})$$

$$907 \quad p_{g,t,i} \sim \text{Beta}(\alpha_{g,t,i}, \beta_{g,t,i})$$

908 A metric (termed "gamma") for the effect of ionizing radiation on the observed brood viability of each  
909 genotype was calculated in the Generated Quantities block during MCMC sampling from the posterior  
910 probability distribution of the parameter p, defined as:

$$911 \quad \text{gamma}_{g,t,i} = \frac{p_{g,t,i}}{p_{g,t,0 \text{ Rads}}}$$

912 In addition to the model fit statistics output from Stan, model fit was assessed by posterior simulations.

913 The expected brood viability for 1000 parent hermaphrodites from each genotype, timepoint, and

914 irradiation treatment were simulated (Supplemental Figure 4B). For each simulated parent  
915 hermaphrodite, a brood size was sampled from the empirical data of the corresponding experimental  
916 group, values for  $\alpha$  and  $\beta$  were sampled from the respective posterior probability distributions, and a  
917 value for  $p$  was simulated from a Beta distribution with shape parameters  $\alpha$  and  $\beta$ . The number of  
918 hatching progeny were simulated  $\sim$ Binomial (brood size,  $p$ ).

### 919 **Intersister/intrachromatid repair assay (ICR Assay)**

920 ICR assays were performed as described in (Toraason *et al.* 2021a; b). Parent (P0) hermaphrodites for  
921 the ICR assay for each genotype were generated by crossing (see cross schemes detailed below).

922 ICR assay cross schemes:

- 923 1) Wild type (N2): P0 hermaphrodites were generated by crossing: (1) N2 males to DLW14  
924 hermaphrodites to generate *unc-5(lib1)/+* IV; *Krls14/+* V males; (2) F1 males to CB791  
925 hermaphrodites to generate *unc-5(lib1)/unc-5(e791)* IV; *Krls14/+* V hermaphrodites.
- 926 2) *brc-1* mutant: P0 hermaphrodites were generated by crossing: (1) JEL730 males to DLW156  
927 hermaphrodites to generate *brc-1(xoe4)* III; *unc-5(lib1)/+* IV; *Krls14/+* V males; (2) F1 males to  
928 DLW157 hermaphrodites to generate *brc-1(xoe4)* III; *unc-5(lib1)/unc-5(e791)* IV; *Krls14/+* V  
929 hermaphrodites.
- 930 3) *smc-5* mutant: P0 hermaphrodites were generated by crossing: (1) YE57 males to DLW23  
931 hermaphrodites to generate *smc-5(ok2421)/mIn1* II; *unc-5(lib1)/+* IV; *Krls14/+* V males; (2) F1 males  
932 to DLW81 hermaphrodites to generate *smc-5(ok2421)* II; *unc-5(lib1)/unc-5(e791)* IV; *Krls14/+* V  
933 hermaphrodites.

934 In brief, P0 hermaphrodites of the desired genotype were isolated 16-18hrs before heat shock and were  
935 maintained at 15°C. Heat shock was performed in an air incubator (refrigerated Peltier incubator, VWR

936 Model VR16P) for one hour. The P0 worms were then allowed to recover at 20°C for nine hours. P0  
937 hermaphrodites were placed onto individual NGM plates seeded with OP50 and maintained at 20°C.  
938 22hrs, 34hrs, and 46hrs after heat shock, the P0 worms were transferred to new NGM plates seeded  
939 with OP50. 58hrs after heat shock, P0 hermaphrodites were removed from their NGM plates and  
940 discarded. Plates with P0 hermaphrodites were maintained at 20°C, while plates with F1 progeny were  
941 placed at 15°C.

942 F1 progeny were scored for GFP fluorescence ~54-70hrs after the P0 hermaphrodite was removed.  
943 ~18hrs before scoring, plates with F1 progeny were placed at 25°C to enhance GFP expression.  
944 Fluorescent phenotype scoring was performed on a Axio Zoom v16 fluorescence stereoscope (Zeiss). F1  
945 progeny which expressed recombinant fluorescence phenotypes were isolated and lysed for sequencing  
946 (see Sequencing and analysis of ICR assay conversion tracts). Nonrecombinant progeny were discarded.  
947 If all progeny on a plate were in larval developmental stages at the time of scoring, then the number of  
948 dead eggs and unfertilized oocytes were additionally recorded.

949 ICR assays in *brc-1(xoe4)* and *smc-5(ok2421)* mutants were replicated 4 times and the broods of at least  
950 20 parent hermaphrodites scored in each replicate. The ICR assay in a wild type genetic background was  
951 performed once and combined with previous data (Toraason *et al.* 2021a).

952 We observed increased GFP+ progeny in the ICR assays we performed in both *brc-1* and *smc-5* mutant  
953 backgrounds as compared to wild type (Supplemental Figure 1). This result was unexpected, as the ICR  
954 assay is performed in parent hermaphrodites which are heterozygous for the ICR assay construct and an  
955 allele of *unc-5* which does not carry any GFP homology. Thus, the homolog is not a viable repair  
956 template to restore GFP fluorescence and we would expect that DSB repair should be ultimately  
957 directed towards intersister/intrachromatid repair templates regardless of the genetic background. This  
958 increased proportion of GFP+ progeny in *brc-1* and *smc-5* mutants may indicate altered bias for the

959 upstream intersister/intrachromatid nonallelic GFP repair template as compared to the allelic repair  
960 template. Allelic recombination in the ICR assay reincorporates the Mos1 transposon into the final repair  
961 product and therefore does not yield a detectable event, so a reduced propensity for this template  
962 engagement would increase the number of GFP+ recombination events we identify. The tandem GFP  
963 sequences of the ICR assay contain polymorphisms (Toraason *et al.* 2021a), and the presence of  
964 nucleotide polymorphisms between damaged DNA sequences and recombination repair templates is  
965 known to reduce the likelihood of recombination between loci (Chen and Jinks-Robertson 1999; Hum  
966 and Jinks-Robertson 2019). It is therefore possible that BRC-1 and SMC-5/6 play some role either in the  
967 detection of polymorphisms during the strand invasion step of recombination or in facilitating the  
968 rejection of heteroduplex recombination intermediates. Previous work has shown that BRC-1 restricts  
969 heterologous recombination (León-Ortiz *et al.* 2018), consistent with a role for BRC-1 in rejecting repair  
970 templates with sequence divergence.

971 Alternately, the elevated rate of GFP+ progeny we observed may be the product of increased Mos1  
972 mobilization in the germlines of *brc-1* and *smc-5* mutants. We propose that this is a less likely  
973 explanation for the rates of GFP+ progeny in the *brc-1* and *smc-5* ICR assays, as the frequencies of non-  
974 Unc progeny were not broadly elevated in the *brc-1* and *smc-5* interhomolog assays, which assess Mos1  
975 excision at the same locus as the ICR assay using an identical Mos1 transposase transgene construct  
976 (Supplemental Figure 2). As we cannot specifically delineate the underlying mechanisms which increase  
977 the rates of GFP+ progeny in *brc-1* and *smc-5* mutants, the frequency of ICR assay recombinants in this  
978 study should not necessarily be extrapolated to represent an absolute increase in rates of  
979 intersister/intrachromatid recombination more broadly in these contexts.

980 **Sequencing and analysis of ICR assay conversion tracts**

981 Recombinant ICR assay progeny were placed in 10 $\mu$ L of 1x Worm Lysis Buffer for lysis (50mM KCl,  
982 100mM TrisHCl pH 8.2, 2.5mM MgCl<sub>2</sub>, 0.45% IGEPAL, 0.45% Tween20, 0.3 $\mu$ g/ $\mu$ L proteinase K in ddH<sub>2</sub>O)  
983 and were iteratively frozen and thawed three times in a dry ice and 95% EtOH bath and a 65°C water  
984 bath. Samples were then incubated at 60°C for one hour and 95°C for 15 minutes to inactivate the  
985 proteinase K. Final lysates were diluted with 10 $\mu$ L ddH<sub>2</sub>O.

986 Conversion tracts were PCR amplified using OneTaq 2x Master Mix (New England Biolabs). Noncrossover  
987 recombination products were amplified using forward primer DLO822 (5'-ATTTTAACCCTTCGGGGTACG-  
988 3') and reverse primer DLO823 (5'-TCCATGCCATGTGTTAATCCCA-3'). Crossover recombination products  
989 were amplified using forward primer DLO824 (5'-AGATCCATCTAGAAATGCCGGT-3') and reverse primer  
990 DLO546 (5'-AGTTGGTAATGGTAGCGACC-3'). PCR products were run on an Agarose gel and desired bands  
991 were isolated by gel extraction (QIAquick Gel Extraction Kit, New England Biolabs) and were eluted in  
992 ddH<sub>2</sub>O. Amplicons were submitted for Sanger sequencing (Sequetech) with three primers.

993 Noncrossovers were sequenced using DLO822, DLO823, and DLO1077 (5'-  
994 CACGGAACAGGTAGGTTTTCCA-3') and crossovers were sequenced using DLO824, DLO546, and  
995 DLO1077.

996 Sanger sequencing chromatograms were analyzed using Benchling alignment software (Benchling) to  
997 determine converted polymorphisms. Heteroduplex DNA signals were identified by two prominent  
998 peaks in the chromatogram at the site of a known polymorphism. Putative heteroduplexed samples  
999 were PCR amplified and submitted for sequencing a second time for confirmation as described above.

1000 Samples which produced PCR products of the expected size but did not yield interpretable sequencing  
1001 were subsequently analyzed using TOPO cloned amplicons. ICR assay locus amplicons were PCR  
1002 amplified as described above but were immediately cloned into pCR2.1 vector using the Original TOPO-  
1003 TA™ Cloning Kit™ (Invitrogen) following kit instructions. Putative successful amplicon clones were

1004 identified by PCR amplification using 2xOneTaq Master Mix (New England Biolabs) with primers DLO883  
1005 (5'-CAGGAAACAGCTATGACCATG-3') and DLO884 (5'-TGTTAAAACGACGGCCAGGT-3'). Plasmids  
1006 containing amplicon inserts were isolated from 2mL LB+Amp cultures using the GENEJET Miniprep kit  
1007 (Fischer Scientific) and were submitted for Sanger sequencing (Sequetech) using primers DLO883 and  
1008 DLO884.

1009 To acquire additional wild type ICR assay crossover tracts for our analyses, three “bulk” replicates of the  
1010 wild type ICR assay were performed following the protocol described in the ‘Intersister/intrachromatid  
1011 repair assay’ with the following exceptions: 1) n=3 hermaphrodites were passaged together on  
1012 individual plates during the experiment; 2) transfers were only performed at 10hr, 22hr, and 46 hr  
1013 following heat shock; and, 3) plates were screened for body wall GFP+ crossover recombinants but the  
1014 frequency of pharynx GFP+ and GFP- nonrecombinant progeny were not scored. Body wall GFP+  
1015 crossover progeny were lysed and following the preceding protocol.

1016 Not all lysed recombinant yielded successful PCR products or sequences. Of the additional wild type ICR  
1017 assay recombinants sequenced for this manuscript, 11 of 11 noncrossover and 52 of 52 crossover lysates  
1018 were successfully sequenced. Among lysates from *brc-1* mutant ICR assays, 37 of 37 noncrossover and  
1019 70 of 73 crossover lysates were successfully sequenced. Among lysates from *smc-5* mutant ICR assays,  
1020 56 of 56 noncrossover and 27 of 28 crossover lysates were successfully sequenced.

#### 1021 **Interhomolog assay (IH assay)**

1022 IH assays were performed as described in (Rosu *et al.* 2011). In brief, P0 hermaphrodites were generated  
1023 by crossing (see cross schemes detailed below).

1024 IH assay cross schemes:



1025 1) Wild type (N2): P0 hermaphrodites were generated by crossing: (1) N2 males to AV554  
1026 hermaphrodites to generate *dpy-13(e184sd) unc-5(ox171::Mos1)/+* IV; Krls14/+ V males; (2) F1  
1027 males to CB791 hermaphrodites to generate *dpy-13(e184sd) unc-5(ox171::Mos1)/unc-5(e791)* IV;  
1028 Krls14/+ V hermaphrodites.

1029 2) *brc-1* mutant: P0 hermaphrodites were generated by crossing: (1) JEL730 males to DLW203  
1030 hermaphrodites to generate *brc-1(xoe4)* III; *dpy-13(e184sd) unc-5(ox171::Mos1)/+* IV; Krls14/+ V  
1031 males; (2) F1 males to DLW157 hermaphrodites to generate *brc-1(xoe4)* III; *dpy-13(e184sd) unc-*  
1032 *5(ox171::Mos1)/unc-5(e791)* IV; Krls14/+ V hermaphrodites.

1033 3) *smc-5* mutant: P0 hermaphrodites were generated by crossing: (1) YE57 males to DLW23  
1034 hermaphrodites to generate *smc-5(ok2421)/mIn1* II; *dpy-13(e184sd) unc-5(ox171::Mos1)/+* IV;  
1035 Krls14/+ V males; (2) F1 males to DLW81 hermaphrodites to generate *smc-5(ok2421)* II; *dpy-*  
1036 *13(e184sd) unc-5(ox171::Mos1)/unc-5(e791)* IV; Krls14/+ V hermaphrodites.

1037 The heat shock and timing at which parent hermaphrodites were transferred to new NGM plates was  
1038 performed identically to the ICR assay (see 'Intersister/Intrachromatid repair assay (ICR assay)' above).  
1039 However, the number of eggs and unfertilized oocytes laid by each hermaphrodite was recorded  
1040 immediately following the removal of the parent hermaphrodite at each timepoint and plates carrying  
1041 F1 progeny were maintained at 20°C. Plates were scored for F1 wild type moving (non-Unc) progeny  
1042 ~84-96hrs after parent hermaphrodites were removed. F1 Unc progeny were discarded.

1043 F1 non-Unc progeny were placed on single NGM plates seeded with OP50 bacteria. Dpy non-Unc  
1044 progeny (putative noncrossover recombinants) were lysed following the protocol described in  
1045 'Sequencing and analysis of SCR assay conversion tracts'. If Dpy non-Unc progeny died before the time  
1046 of lysis and had laid F2 progeny, non-Unc segregant F2s were lysed instead. Non-Dpy non-Unc progeny  
1047 (putative crossover recombinants) were allowed to lay F2 progeny. If progeny were laid and Dpy non-

1048 Unc F2 segregants were identified, these Dpy non-Unc F2s were lysed and the F1 was inferred not to be  
1049 a crossover recombinant. If >50 F2 progeny were on the plate and no Dpy non-Unc segregants were  
1050 identified, the F1 was assumed to be a crossover recombinant and no worms were lysed. If very few  
1051 progeny were laid and no Dpy non-Unc segregants were identified, the F1 non-Unc or its non-Unc F2  
1052 offspring were lysed and subsequently subjected to PCR genotyping analysis using OneTaq 2x Master  
1053 Mix (New England Biolabs) to determine the genotype of *unc-5* and *dpy-13*. The presence of *Mos1* in the  
1054 *unc-5* locus was assessed using primers DLO987 (5'-TCTTCTTGCCAAAGCGATTC-3') and DLO1082 (5'-  
1055 TTCTCTCCGAGCAATGTTCC-3'). The *dpy-13* locus was assessed using primers DLO151 (5'-  
1056 ATTCCGGATGCGAGGGAT-3') and DLO152 (5'-TCTCCTCGCAAGGCTTCTGT-3'). Lysed F1 nUnc nDpy  
1057 progeny were inferred to be crossover recombinants if the worms 1) carried the *Mos1* transposon at the  
1058 *unc-5* locus and were heterozygous for the *dpy-13(e184)* allele, or; 2) did not carry the *Mos1* transposon  
1059 at the *unc-5* locus and were homozygous wild type for *dpy-13*.

1060 The *unc-5* locus was amplified for sequencing by PCR using OneTaq 2x Master Mix (NEB) with primers  
1061 DLO1081 (5'-TCTTTTCAGGCTTTGGCACTG-3') and DLO1082. PCR products were run on an agarose gel  
1062 and desired bands were isolated by gel extraction (QIAquick Gel Extraction Kit, New England Biolabs)  
1063 and were eluted in ddH<sub>2</sub>O. These amplicons were submitted for Sanger sequencing (Sequetech) with  
1064 primer DLO1082 or DLO150 (5'-GTTCCATGTTTGATGCTCCAAAAG-3'). Sanger sequencing chromatograms  
1065 were compared to the wild type *unc-5* sequence using Benchling alignment software. Samples which  
1066 showed a reversion to wild-type *unc-5* sequence at the site of *Mos1* excision were inferred to be  
1067 noncrossover recombinants. Samples which showed mutations that preserved the reading frame of the  
1068 *unc-5* locus were considered 'mutant non-Unc'. One of the five *brc-1* IH assay mutant non-Uncs we  
1069 sequenced carried two distinguishable mutagenic repair products. These two mutations likely represent  
1070 the outcomes of both a meiotic DSB repair event and an additional somatic repair event in the progeny.  
1071 We have previously observed analogous somatic *Mos1* excision events in F1 progeny in the ICR assay

1072 (Toraason *et al.* 2021a; b). As we cannot distinguish the source of the respective repair events, this  
1073 mutant was excluded from subsequent sequence analysis (Supplemental Figure 3).

1074 Samples which showed mixed sequences despite a clear amplicon being generated in the PCR were  
1075 subsequently TOPO cloned, as described in ‘Sequencing and analysis of ICR assay conversion tracts’,  
1076 except that the amplicon used in the reaction was generated using primers DLO1081 and DLO1082.

1077 Not all interhomolog assay non-Unc progeny were able to be confirmed as recombinants by sequencing.  
1078 Of the wild type IH assay non-Unc progeny identified, 176 of 178 putative noncrossovers were  
1079 successfully sequenced. Among lysates from *brc-1* mutant IH assays, 72 of 76 putative noncrossovers  
1080 were successfully sequenced. Among lysates from *smc-5* mutant IH assays, 213 of 229 putative  
1081 noncrossovers were successfully sequenced. Non-Unc progeny whose *unc-5* DNA repair events could not  
1082 be identified by sequencing were considered ‘undetermined non-Unc’ in subsequent analyses of this  
1083 data.

#### 1084 **EdU Sister Chromatid Exchange Assay**

1085 EdU Sister Chromatid Exchange assays were performed as described in (Almanzar *et al.* 2021, 2022).

#### 1086 **Immunofluorescence localization of SMC-5/6 and BRC-1**

1087 Immunofluorescence was performed as in (Libuda *et al.* 2013) or (Howe *et al.* 2001). For both protocols,  
1088 L4 staged hermaphrodites were isolated 18-22hrs before dissection and maintained at 20°C on NGM  
1089 plates seeded with OP50. Nematodes which were irradiated preceding an immunofluorescence  
1090 experiment were exposed to a Cs<sup>137</sup> source (University of Oregon) were dissected less than an hour after  
1091 following irradiation. Samples prepared for GFP::*BRC-1* visualization were dissected in 1x Egg Buffer  
1092 (118 mM NaCl, 48 mM KCl<sub>2</sub>, 2 mM CaCl<sub>2</sub>, 2 mM MgCl<sub>2</sub>, 25 mM HEPES pH7.4, 0.1% Tween20) and were  
1093 fixed in 1x Egg Buffer with 1% paraformaldehyde for 5 min on a Superfrost Plus slide (VWR). Samples

1094 prepared for SMC-5::AID\*::3xFLAG visualization were dissected in 1x Sperm Salts (50mM PIPES pH7,  
1095 25mM KCl, 1mM MgSO<sub>4</sub>, 45mM NaCl, 2mM CaCl<sub>2</sub>) and an equal volume of 1x Sperm Salts with 3%  
1096 paraformaldehyde was applied for 5 min before samples were affixed to a Superfrost Plus slide (VWR).  
1097 For both protocols, gonads were then flash frozen in liquid nitrogen and the cover slip was removed.  
1098 Germlines stained for GFP::BRC-1 were then fixed for 1 min in ice cold MeOH and then were washed in  
1099 1x PBST (1x PBS, 0.1% Tween20), while germlines stained for SMC-5::AID\*::3xFLAG were fixed for 1 min  
1100 in ice cold 95% EtOH and then were washed in 1xPBST\* (1x PBS, 0.5% Triton-X100, 1mM EDTA pH8).  
1101 Slides were then washed 3x in PBST or PBST\* respectively before being placed in Block (1xPBST or  
1102 1xPBST\* with 0.7% bovine serum albumin) for at least 1 hour.

1103 Primary antibody staining was performed by placing 50μL of antibody diluted in PBST for samples in  
1104 which GFP::BRC-1 or RAD-51 were to be visualized or PBST\* if the sample was to be stained for SMC-  
1105 5::AID\*::3xFLAG (see below for specific dilutions of primary antibodies). A parafilm coverslip was placed  
1106 on each sample and the slides were incubated for 16-18hrs in a dark humidifying chamber. Slides were  
1107 then washed 3x in PBST or PBST\* for 10 min. 50μL of secondary antibody diluted in PBST for samples in  
1108 which GFP::BRC-1 or RAD-51 were to be visualized or PBST\* if the sample was to be stained for SMC-  
1109 5::AID\*::3xFLAG (see below for specific dilutions of primary antibodies) was then placed on each slide.  
1110 Slides were incubated for 2hrs in a dark humidifying chamber with a parafilm coverslip. Slides were then  
1111 washed 3x in PBST or PBST\* for 10 min in a dark chamber. 50μL of 2μg/mL DAPI was then applied to  
1112 each slide. Slides were incubated in a dark humidifying chamber with parafilm coverslips for 5 min.  
1113 Slides were then washed 1x in PBST or PBST\* for 5 min in a dark chamber before being mounted in  
1114 VectaShield with a No. 1.5 coverslip (VWR) and sealed with nail polish.

1115 Slides were maintained at 4°C until imaging. All slides stained for SMC-5::AID\*::3xFLAG were imaged  
1116 within 48 hours of mounting. Immunofluorescence images were acquired at 512x512 pixel dimensions  
1117 on an Applied Precision DeltaVision microscope. All images were acquired in 3D using Z-stacks at 0.2μm

1118 intervals and were deconvolved with Applied Precision softWoRx deconvolution software. Individual  
1119 images of whole germlines were stitched as 3D Z-stacks in FIJI using the Grid/Collection Stitching plugin  
1120 (Preibisch *et al.* 2009) or as maximum intensity projections using Photoshop (Adobe). The intensity  
1121 levels of images displayed in this manuscript were adjusted in Photoshop for clarity.

1122 The following primary antibodies were used In this study at the given dilutions: Chicken  $\alpha$ RAD-51  
1123 (1:1000; (Kurhanewicz *et al.* 2020)), Mouse  $\alpha$ mini-AID M214-3 (1:500, MBL International), Rat  $\alpha$ HTP-3  
1124 (1:1000, this study), Rabbit  $\alpha$ GFP (1:500 (Yokoo *et al.* 2012)).

1125 Immunofluorescence staining of SMC-5/6 was further attempted using previously published antibodies  
1126 (Bickel *et al.* 2010). We were unable to generate samples with specific staining using these antibodies,  
1127 potentially due to their age. We additionally attempted to raise new antibodies using the previously  
1128 published epitopes (Bickel *et al.* 2010) (synthesized by GenScript) in chickens (SMC-5) or rabbits (SMC-6).  
1129 Neither of these antibodies exhibited specific staining.

### 1130 **Antibody Generation**

1131 The HTP-3 antibody used in this study was generated from an identical C-terminal segment of the HTP-3  
1132 protein (synthesized by GenScript) as was used by (MacQueen *et al.* 2005). Antibodies were produced in  
1133 rats and affinity purified by Pocono Rabbit Farms.

### 1134 **Statistics**

1135 All statistics were calculated in R (v4.0.3). Specific tests utilized are described in text or in the figure  
1136 legends. Data wrangling was performed using the Tidyverse (v1.3.0). Bayesian hierarchical models were  
1137 fit using Rstan (v2.21.2). Binomial Confidence Intervals were calculated using the DescTools package (v  
1138 0.99.38).

### 1139 **Data Availability**

1140 All data generated or analyzed in this study are included in the manuscript and supporting files. Source  
1141 data files have been provided for Figures 1A, 1C, 1D, 1E, 2A, 2B, 2D, 2E, 3 (all panels), and 4A. Source  
1142 data files have also been provided for Supplemental Figures 1 (all panels), 2 (all panels), 4A, and 6A.  
1143 Source code files have been provided for Figure 4A.

1144

1145

1146 **Literature Cited**

- 1147 Adamo A., P. Montemauri, N. Silva, J. D. Ward, S. J. Boulton, *et al.*, 2008 BRC-1 acts in the inter-sister  
1148 pathway of meiotic double-strand break repair. *EMBO Rep.* 9: 287–292.
- 1149 Ahuja J. S., C. S. Harvey, D. L. Wheeler, and M. Lichten, 2021 Repeated strand invasion and extensive  
1150 branch migration are hallmarks of meiotic recombination. *Mol. Cell* 81: 4258–4270.
- 1151 Almanzar D. E., S. G. Gordon, and O. Rog, 2021 Meiotic sister chromatid exchanges are rare in *C.*  
1152 *elegans*. *Curr. Biol.* 31: 1499–1507.
- 1153 Almanzar D. E., A. Hamrick, and O. Rog, 2022 Single-sister labeling in the *C. elegans* germline using the  
1154 nucleotide analog EdU. *STAR Protoc.* 3: 101344.
- 1155 Andrews E. A., J. Palecek, J. Sergeant, E. Taylor, A. R. Lehmann, *et al.*, 2005 Nse2, a Component of the  
1156 Smc5-6 Complex, Is a SUMO Ligase Required for the Response to DNA Damage. *Mol. Cell. Biol.* 25:  
1157 185–196.
- 1158 Aragón L., 2018 The Smc5/6 Complex: New and Old Functions of the Enigmatic Long-Distance Relative.  
1159 *Annu. Rev. Genet.* 52: 89–107.
- 1160 Bae W., J. H. Park, M. H. Lee, H. W. Park, and H. S. Koo, 2020 Hypersensitivity to DNA double-strand  
1161 breaks associated with PARG deficiency is suppressed by *exo-1* and *polq-1* mutations in  
1162 *Caenorhabditis elegans*. *FEBS J.* 287: 1101–1115.
- 1163 Bessereau J. L., A. Wright, D. C. Williams, K. Schuske, M. W. Davis, *et al.*, 2001 Mobilization of a  
1164 *Drosophila* transposon in the, *Caenorhabditis elegans* germ line. *Nature* 413: 70–74.
- 1165 Bickel J. S., L. Chen, J. Hayward, S. L. Yeap, A. E. Alkers, *et al.*, 2010 Structural maintenance of  
1166 chromosomes (SMC) proteins promote homolog-independent recombination repair in meiosis

- 1167 crucial for germ cell genomic stability. *PLoS Genet.* 6: 1–13.
- 1168 Bonner J. N., K. Choi, X. Xue, N. P. Torres, B. Szakal, *et al.*, 2016 Smc5/6 Mediated Sumoylation of the  
1169 Sgs1-Top3-Rmi1 Complex Promotes Removal of Recombination Intermediates. *Cell Rep.* 16: 368–  
1170 378.
- 1171 Boulton S. J., J. S. Martin, J. Polanowska, D. E. Hill, A. Gartner, *et al.*, 2004 BRCA1/BARD1 Orthologs  
1172 Required for DNA Repair in *Caenorhabditis elegans*. *Curr. Biol.* 14: 33–39.
- 1173 Cahoon C. K., and D. E. Libuda, 2021 Conditional immobilization for live imaging *Caenorhabditis elegans*  
1174 using auxin-dependent protein depletion. *G3 Genes, Genomes, Genet.* 11.
- 1175 Chandramouly G., A. Kwok, B. Huang, N. A. Willis, A. Xie, *et al.*, 2013 BRCA1 and CtIP suppress long-tract  
1176 gene conversion between sister chromatids. *Nat. Commun.* 4.
- 1177 Chen W., and S. Jinks-Robertson, 1999 The Role of the Mismatch Repair Machinery in Regulating Mitotic  
1178 and Meiotic Recombination Between Diverged Sequences in Yeast. *Genetics* 151: 1299–1313.
- 1179 Chen L., C. J. Nievera, A. Y. L. Lee, and X. Wu, 2008 Cell cycle-dependent complex formation of  
1180 BRCA1-CtIP-MRN is important for DNA double-strand break repair. *J. Biol. Chem.* 283: 7713–7720.
- 1181 Chen Y.-H., K. Choi, B. Szakal, J. Arenz, X. Duan, *et al.*, 2009 Interplay between the Smc5/6 complex and  
1182 the Mph1 helicase in recombinational repair. *PNAS* 106: 21252–21257.
- 1183 Chung W. H., Z. Zhu, A. Papusha, A. Malkova, and G. Ira, 2010 Defective resection at DNA double-strand  
1184 breaks leads to de Novo telomere formation and enhances gene targeting. *PLoS Genet.* 6: 24.
- 1185 Church D. L., Guan Kun-Liang, and E. J. Lambie, 1995 Three genes of the MAP kinase cascade, *mek-2*,  
1186 *mpk-1/sur-1* and *let-60 ras*, are required for meiotic cell cycle progression in *Caenorhabditis*  
1187 *elegans*. *Development* 121: 2525–2535.



- 1188 Colaiácovo M. P., A. J. MacQueen, E. Martinez-Perez, K. McDonald, A. Adamo, *et al.*, 2003 Synaptonemal  
1189 complex assembly in *C. elegans* is dispensable for loading strand-exchange proteins but critical for  
1190 proper completion of recombination. *Dev. Cell* 5: 463–474.
- 1191 Copsey A., S. Tang, P. W. Jordan, H. G. Blitzblau, S. Newcombe, *et al.*, 2013 Smc5/6 Coordinates  
1192 Formation and Resolution of Joint Molecules with Chromosome Morphology to Ensure Meiotic  
1193 Divisions. *PLoS Genet.* 9: 1–24.
- 1194 Crown K. N., S. McMahan, and J. Sekelsky, 2014 Eliminating Both Canonical and Short-Patch Mismatch  
1195 Repair in *Drosophila melanogaster* Suggests a New Meiotic Recombination Model. *PLoS Genet* 10:  
1196 1–11.
- 1197 Cruz-García A., A. López-Saavedra, and P. Huertas, 2014 BRCA1 accelerates CtIP-mediated DNA-end  
1198 resection. *Cell Rep.* 9: 451–459.
- 1199 Gartner A., and J. A. Engebrecht, 2022 DNA repair, recombination, and damage signaling. *Genetics* 220.
- 1200 Goldfarb T., and M. Lichten, 2010 Frequent and efficient use of the sister chromatid for DNA double-  
1201 strand break repair during budding yeast meiosis. *PLoS Biol.* 8: 1–12.
- 1202 Guo X., Y. F. Hum, K. Lehner, and S. Jinks-Robertson, 2017 Regulation of hetDNA Length during Mitotic  
1203 Double-Strand Break Repair in Yeast. *Mol. Cell* 67: 539-549.e4.
- 1204 Hayashi M., G. M. Chin, and A. M. Villeneuve, 2007 *C. elegans* germ cells switch between distinct modes  
1205 of double-strand break repair during meiotic prophase progression. *PLoS Genet.* 3: 2068–2084.
- 1206 Hong Y., R. Sonnevile, A. Agostinho, B. Meier, B. Wang, *et al.*, 2016 The SMC-5/6 Complex and the HIM-  
1207 6 (BLM) Helicase Synergistically Promote Meiotic Recombination Intermediate Processing and  
1208 Chromosome Maturation during *Caenorhabditis elegans* Meiosis. *PLoS Genet* 12: 1–24.

- 1209 Howe M., K. L. McDonald, D. G. Albertson, and B. J. Meyer, 2001 HIM-10 Is Required for Kinetochore  
1210 Structure and Function on *Caenorhabditis elegans* Holocentric Chromosomes. *J. Cell Biol.* 153:  
1211 1227–1238.
- 1212 Huen M. S. Y., S. M. H. Sy, and J. Chen, 2010 BRCA1 and its toolbox for the maintenance of genome  
1213 integrity. *Nat. Rev. Mol. Cell Biol.* 11: 138–148.
- 1214 Hum Y. F., and S. Jinks-Robertson, 2019 Mismatch recognition and subsequent processing have distinct  
1215 effects on mitotic recombination intermediates and outcomes in yeast. *Nucleic Acids Res.* 47:  
1216 4554–4568.
- 1217 Humphryes N., and A. Hochwagen, 2014 A non-sister act: Recombination template choice during  
1218 meiosis. *Exp. Cell Res.* 329: 53–60.
- 1219 Hunter N., 2015 Meiotic recombination: The essence of heredity. *Cold Spring Harb. Perspect. Biol.* 7.
- 1220 Janisiw E., M. R. Dello Stritto, V. Jantsch, and N. Silva, 2018 BRCA1-BARD1 associate with the  
1221 synaptonemal complex and pro-crossover factors and influence RAD-51 dynamics during  
1222 *Caenorhabditis elegans* meiosis. *PLoS Genet.* 14.
- 1223 Jaramillo-Lambert A., M. Ellefson, A. M. Villeneuve, and J. A. Engebrecht, 2007 Differential timing of S  
1224 phases, X chromosome replication, and meiotic prophase in the *C. elegans* germ line. *Dev. Biol.*  
1225 308: 206–221.
- 1226 Kamp J. A., R. van Schendel, I. W. Dilweg, and M. Tijsterman, 2020 BRCA1-associated structural  
1227 variations are a consequence of polymerase theta-mediated end-joining. *Nat. Commun.* 11: 1–10.
- 1228 Keelagher R. E., V. E. Cotton, A. S. H. Goldman, and R. H. Borts, 2011 Separable roles for Exonuclease I in  
1229 meiotic DNA double-strand break repair. *DNA Repair (Amst).* 10: 126–137.

- 1230 Keeney S., C. N. Giroux, and N. Kleckner, 1997 Meiosis-Specific DNA Double-Strand Breaks Are Catalyzed  
1231 by Spo11, a Member of a Widely Conserved Protein Family. *Cell* 88: 375–384.
- 1232 Kim K. P., B. M. Weiner, L. Zhang, A. Jordan, J. Dekker, *et al.*, 2010 Sister cohesion and structural axis  
1233 components mediate homolog bias of meiotic recombination. *Cell* 143: 924–937.
- 1234 Kritikou E. A., S. Milstein, P. O. Vidalain, G. Lettre, E. Bogan, *et al.*, 2006 *C. elegans* GLA-3 is a novel  
1235 component of the MAP kinase MPK-1 signaling pathway required for germ cell survival. *Genes Dev.*  
1236 20: 2279–2292.
- 1237 Kurhanewicz N. A., D. Dinwiddie, Z. D. Bush, and D. E. Libuda, 2020 Elevated Temperatures Cause  
1238 Transposon-Associated DNA Damage in *C. elegans* Spermatocytes. *Curr. Biol.* 30: 5007-5017.e4.
- 1239 Lee M. H., M. Ohmachi, S. Arur, S. Nayak, R. Francis, *et al.*, 2007 Multiple functions and dynamic  
1240 activation of MPK-1 extracellular signal-regulated kinase signaling in *Caenorhabditis elegans*  
1241 germline development. *Genetics* 177: 2039–2062.
- 1242 Lemmens B. B. L. G., N. M. Johnson, and M. Tijsterman, 2013 COM-1 Promotes Homologous  
1243 Recombination during *Caenorhabditis elegans* Meiosis by Antagonizing Ku-Mediated Non-  
1244 Homologous End Joining. *PLoS Genet.* 9: 1–14.
- 1245 León-Ortiz A. M., S. Panier, G. Sarek, J. B. Vannier, H. Patel, *et al.*, 2018 A Distinct Class of Genome  
1246 Rearrangements Driven by Heterologous Recombination. *Mol. Cell* 69: 292-305.e6.
- 1247 Li Q., T. T. Saito, M. Martinez-Garcia Id, A. J. Deshong, S. Nadarajan Id, *et al.*, 2018 The tumor suppressor  
1248 BRCA1-BARD1 complex localizes to the synaptonemal complex and regulates recombination under  
1249 meiotic dysfunction in *Caenorhabditis elegans*. *PLOS Genet.* 14: 1–34.
- 1250 Li Q., S. Hariri, and J. Engebrecht, 2020 Meiotic double-strand break processing and crossover patterning  
1251 are regulated in a sex-specific manner by BRCA1-BARD1 in *C. elegans*. *Genetics* 216: 359–379.

- 1252 Libuda D. E., S. Uzawa, B. J. Meyer, and A. M. Villeneuve, 2013 Meiotic chromosome structures constrain  
1253 and respond to designation of crossover sites. *Nature* 502: 703–706.
- 1254 Lilienthal I., T. Kanno, and C. Sjögren, 2013 Inhibition of the Smc5/6 Complex during Meiosis Perturbs  
1255 Joint Molecule Formation and Resolution without Significantly Changing Crossover or Non-  
1256 crossover Levels. *PLoS Genet.* 9.
- 1257 Macaisne N., Z. Kessler, and J. L. Yanowitz, 2018 Meiotic double-strand break proteins influence repair  
1258 pathway utilization. *Genetics* 210: 843–856.
- 1259 MacQueen A. J., C. M. Phillips, N. Bhalla, P. Weiser, A. M. Villeneuve, *et al.*, 2005 Chromosome sites play  
1260 dual roles to establish homologous synapsis during meiosis in *C. elegans*. *Cell* 123: 1037–1050.
- 1261 Marsolier-Kergoat M. C., M. M. Khan, J. Schott, X. Zhu, and B. Llorente, 2018 Mechanistic View and  
1262 Genetic Control of DNA Recombination during Meiosis. *Mol. Cell* 70: 9-20.e6.
- 1263 McVey M., J. R. LaRocque, M. D. Adams, and J. J. Sekelsky, 2004 Formation of deletions during double-  
1264 strand break repair in *Drosophila* DmBlm mutants occurs after strand invasion. *PNAS* 101: 15694–  
1265 15699.
- 1266 Meier B., N. V. Volkova, Y. Hong, S. Bertolini, V. González-Huici, *et al.*, 2021 Protection of the *C. elegans*  
1267 germ cell genome depends on diverse DNA repair pathways during normal proliferation. *PLoS One*  
1268 16.
- 1269 Nadarajan S., F. Mohideen, Y. B. Tzur, N. Ferrandiz, O. Crawley, *et al.*, 2016 The MAP kinase pathway  
1270 coordinates crossover designation with disassembly of synaptonemal complex proteins during  
1271 meiosis. *Elife* 5.
- 1272 Pâques F., and J. E. Haber, 1999 Multiple Pathways of Recombination Induced by Double-Strand Breaks  
1273 in *Saccharomyces cerevisiae*. *Microbiol. Mol. Biol. Rev.* 63: 349–404.

- 1274 Peng X. P., S. Lim, S. Li, L. Marjavaara, A. Chabes, *et al.*, 2018 Acute Smc5/6 depletion reveals its primary  
1275 role in rDNA replication by restraining recombination at fork pausing sites. *PLoS Genet.* 14.
- 1276 Pradhan B., T. Kanno, M. Umeda Igarashi, M. Dieter Baaske, J. Siu Kei Wong, *et al.*, 2022 The Smc5/6  
1277 complex is a DNA loop extruding motor. *BioRxiv*.
- 1278 Preibisch S., S. Saalfeld, and P. Tomancak, 2009 Globally optimal stitching of tiled 3D microscopic image  
1279 acquisitions. *Bioinforma. Appl.* 25: 1463–1465.
- 1280 Ramsden D. A., J. Carvajal-Garcia, and G. P. Gupta, 2022 Mechanism, cellular functions and cancer roles  
1281 of polymerase-theta-mediated DNA end joining. *Nat. Rev. Mol. Cell Biol.* 23: 125–140.
- 1282 Robert V., and J.-L. Bessereau, 2007 Targeted engineering of the *Caenorhabditis elegans* genome  
1283 following Mos1-triggered chromosomal breaks. *EMBO J.* 26: 170–183.
- 1284 Robert V. J., M. W. Davis, E. M. Jorgensen, and J.-L. Bessereau, 2008 Gene Conversion and End-Joining-  
1285 Repair Double-Strand Breaks in the *Caenorhabditis elegans* Germline. *Genetics* 180: 673–679.
- 1286 Rosu S., D. E. Libuda, and A. M. Villeneuve, 2011 Robust crossover assurance and regulated  
1287 interhomolog access maintain meiotic crossover number. *Science (80-. )*. 334: 1286–1289.
- 1288 Schendel R. Van, S. F. Roerink, V. Portegijs, S. Van Den Heuvel, and M. Tijsterman, 2015 Polymerase  $\theta$  is  
1289 a key driver of genome evolution and of CRISPR/Cas9-mediated mutagenesis. *Nat. Commun.* 6: 1–  
1290 8.
- 1291 Schvarzstein M., D. Pattabiraman, D. E. Libuda, A. Ramadugu, A. Tam, *et al.*, 2014 DNA Helicase HIM-  
1292 6/BLM Both Promotes MutSg-Dependent Crossovers and Antagonizes MutSg-Independent  
1293 Interhomolog Associations During *Caenorhabditis elegans* Meiosis. *Genetics* 198: 193–207.
- 1294 Schwacha A., and N. Kleckner, 1994 Identification of joint molecules that form frequently between

- 1295 homologs but rarely between sister chromatids during yeast meiosis. *Cell* 76: 51–63.
- 1296 Schwacha A., and N. Kleckner, 1997 Interhomolog Bias during Meiotic Recombination: Meiotic Functions  
1297 Promote a Highly Differentiated Interhomolog-Only Pathway. *Cell* 90: 1123–1135.
- 1298 Stan Development Team, 2021 “RStan: the R interface to Stan.”
- 1299 Szostak J. W., T. L. Orr-Weaver, R. J. Rothstein, and F. W. Stahl, 1983 The Double-Strand-Break Repair  
1300 Model for Recombination. *Cell* 33: 25–35.
- 1301 Toraason E., A. Horacek, C. Clark, M. L. Glover, V. L. Adler, *et al.*, 2021a Meiotic DNA break repair can  
1302 utilize homolog-independent chromatid templates in *C. elegans*. *Curr. Biol.* 31: 1508-1514.e5.
- 1303 Toraason E., M. Glover, A. Horacek, and D. E. Libuda, 2021b Detection of homolog-independent meiotic  
1304 DNA repair events in *C. elegans* with the intersister/intrachromatid repair assay. *STAR Protoc.* 2:  
1305 100801.
- 1306 Tzur Y. B., E. Winter, J. Gao, T. Hashimshony, I. Yanai, *et al.*, 2018 Spatiotemporal Gene Expression  
1307 Analysis of the *Caenorhabditis elegans* Germline Uncovers a Syncytial Expression Switch. *Genetics*  
1308 210: 587–605.
- 1309 Volkova N. V, B. Meier, V. González-Huici, S. Bertolini, S. Gonzalez, *et al.*, 2020 Mutational signatures are  
1310 jointly shaped by DNA damage and repair. *Nat. Commun.* 11: 1–15.
- 1311 Weinert B. T., and D. C. Rio, 2007 DNA strand displacement, strand annealing and strand swapping by  
1312 the *Drosophila* Bloom’s syndrome helicase. *Nucleic Acids Res.* 35: 1367–1376.
- 1313 Wolters S., M. A. Ermolaeva, J. S. Bickel, J. M. Fingerhut, J. Khanikar, *et al.*, 2014 Loss of *caenorhabditis*  
1314 *elegans* BRCA1 promotes genome stability during replication in *smc-5* mutants. *Genetics* 196: 985–  
1315 999.

- 1316 Xaver M., L. Huang, D. Chen, and F. Klein, 2013 Smc5/6-Mms21 Prevents and Eliminates Inappropriate  
1317 Recombination Intermediates in Meiosis. *PLoS Genet.* 9.
- 1318 Yin Y., and S. Smolikove, 2013 Impaired Resection of Meiotic Double-Strand Breaks Channels Repair to  
1319 Nonhomologous End Joining in *Caenorhabditis elegans*. *Mol. Cell. Biol.* 33: 2732–2747.
- 1320 Yokoo R., K. A. Zawadzki, K. Nabeshima, M. Drake, S. Arur, *et al.*, 2012 COSA-1 Reveals Robust  
1321 Homeostasis and Separable Licensing and Reinforcement Steps Governing Meiotic Crossovers. *Cell*  
1322 149: 75–87.
- 1323 Zakharyevich K., Y. Ma, S. Tang, P. Y. H. Hwang, S. Boiteux, *et al.*, 2010 Temporally and Biochemically  
1324 Distinct Activities of Exo1 during Meiosis: Double-Strand Break Resection and Resolution of Double  
1325 Holliday Junctions. *Mol. Cell* 40: 1001–1015.
- 1326 Zhao W., J. B. Steinfeld, F. Liang, X. Chen, D. G. Maranon, *et al.*, 2017 BRCA1-BARD1 promotes RAD51-  
1327 mediated homologous DNA pairing. *Nature* 550: 360–364.
- 1328
